# Supplementary material for: Psychological characteristics and the mediating role of the 5C Model in explaining students’ COVID-19 vaccination intention
Source: PubMed Central journal article supplement (PMC8357093; doi:10.1371/journal.pone.0255382), 2021-08-11

Psychological characteristics associated with students' COVID-19 vaccination intention  
 --Manuscript Draft--

|                                                                                                                                                                                                                                                                                                                                                                                                                                 |                                                                                                                                                                                                                                                                                                                                                                                                                                                                                                                                                                                                                                                                                                                                                                                                                                                                                                                                                                                                                                                                                                                                                                                                                                                                                                                                                                                                                                                                                 |
|---------------------------------------------------------------------------------------------------------------------------------------------------------------------------------------------------------------------------------------------------------------------------------------------------------------------------------------------------------------------------------------------------------------------------------|---------------------------------------------------------------------------------------------------------------------------------------------------------------------------------------------------------------------------------------------------------------------------------------------------------------------------------------------------------------------------------------------------------------------------------------------------------------------------------------------------------------------------------------------------------------------------------------------------------------------------------------------------------------------------------------------------------------------------------------------------------------------------------------------------------------------------------------------------------------------------------------------------------------------------------------------------------------------------------------------------------------------------------------------------------------------------------------------------------------------------------------------------------------------------------------------------------------------------------------------------------------------------------------------------------------------------------------------------------------------------------------------------------------------------------------------------------------------------------|
| <b>Manuscript Number:</b>                                                                                                                                                                                                                                                                                                                                                                                                       | PONE-D-21-15022                                                                                                                                                                                                                                                                                                                                                                                                                                                                                                                                                                                                                                                                                                                                                                                                                                                                                                                                                                                                                                                                                                                                                                                                                                                                                                                                                                                                                                                                 |
| <b>Article Type:</b>                                                                                                                                                                                                                                                                                                                                                                                                            | Research Article                                                                                                                                                                                                                                                                                                                                                                                                                                                                                                                                                                                                                                                                                                                                                                                                                                                                                                                                                                                                                                                                                                                                                                                                                                                                                                                                                                                                                                                                |
| <b>Full Title:</b>                                                                                                                                                                                                                                                                                                                                                                                                              | Psychological characteristics associated with students' COVID-19 vaccination intention                                                                                                                                                                                                                                                                                                                                                                                                                                                                                                                                                                                                                                                                                                                                                                                                                                                                                                                                                                                                                                                                                                                                                                                                                                                                                                                                                                                          |
| <b>Short Title:</b>                                                                                                                                                                                                                                                                                                                                                                                                             | Psychological characteristics associated with students' COVID-19 vaccination intention                                                                                                                                                                                                                                                                                                                                                                                                                                                                                                                                                                                                                                                                                                                                                                                                                                                                                                                                                                                                                                                                                                                                                                                                                                                                                                                                                                                          |
| <b>Corresponding Author:</b>                                                                                                                                                                                                                                                                                                                                                                                                    | Annelot Wismans<br>Erasmus University Rotterdam: Erasmus Universiteit Rotterdam<br>Rotterdam, NETHERLANDS                                                                                                                                                                                                                                                                                                                                                                                                                                                                                                                                                                                                                                                                                                                                                                                                                                                                                                                                                                                                                                                                                                                                                                                                                                                                                                                                                                       |
| <b>Keywords:</b>                                                                                                                                                                                                                                                                                                                                                                                                                | vaccination intention; COVID-19; students; 5C model; public health                                                                                                                                                                                                                                                                                                                                                                                                                                                                                                                                                                                                                                                                                                                                                                                                                                                                                                                                                                                                                                                                                                                                                                                                                                                                                                                                                                                                              |
| <b>Abstract:</b>                                                                                                                                                                                                                                                                                                                                                                                                                | To achieve herd immunity against COVID-19, it is crucial to know the drivers of vaccination intention and, thereby, vaccination. As the determinants of vaccination differ across vaccines, target groups and contexts, we investigate COVID-19 vaccination intention using data from university students from three countries, the Netherlands, Belgium and Portugal, and the 5C model. This model includes five antecedents of vaccination: Confidence, Complacency, Constraints, Calculation and Collective Responsibility. First, we show that the majority of students have a positive propensity toward getting vaccinated against COVID-19, though only 41% of students are completely acceptant. Second, using the 5C model, we show that 'Confidence' and 'Collective Responsibility' are most influential in terms of students' COVID-19 vaccination intention. Using mediation analyses, we show that the perceived risk and effectiveness of the vaccine as well as trust in the government and health authorities indirectly affect vaccination intention through 'Confidence'. The perceived risk of COVID-19 for one's social circle and altruism, the need to belong and psychopathy traits indirectly affect vaccination intention through 'Collective Responsibility'. Hence, targeting the psychological characteristics associated with 'Confidence' and 'Collective Responsibility' can improve the effectiveness of vaccination campaigns among students. |
| <b>Order of Authors:</b>                                                                                                                                                                                                                                                                                                                                                                                                        | Annelot Wismans<br>Roy Thurik<br>Rui Baptista<br>Marcus Dejardin<br>Frank Janssen<br>Ingmar Franken                                                                                                                                                                                                                                                                                                                                                                                                                                                                                                                                                                                                                                                                                                                                                                                                                                                                                                                                                                                                                                                                                                                                                                                                                                                                                                                                                                             |
| <b>Additional Information:</b>                                                                                                                                                                                                                                                                                                                                                                                                  |                                                                                                                                                                                                                                                                                                                                                                                                                                                                                                                                                                                                                                                                                                                                                                                                                                                                                                                                                                                                                                                                                                                                                                                                                                                                                                                                                                                                                                                                                 |
| <b>Question</b>                                                                                                                                                                                                                                                                                                                                                                                                                 | <b>Response</b>                                                                                                                                                                                                                                                                                                                                                                                                                                                                                                                                                                                                                                                                                                                                                                                                                                                                                                                                                                                                                                                                                                                                                                                                                                                                                                                                                                                                                                                                 |
| <b>Financial Disclosure</b><br><br>Enter a financial disclosure statement that describes the sources of funding for the work included in this submission. Review the <a href="#">submission guidelines</a> for detailed requirements. View published research articles from <a href="#">PLOS ONE</a> for specific examples.<br><br>This statement is required for submission and <b>will appear in the published article</b> if | The author(s) received no specific funding for this work.                                                                                                                                                                                                                                                                                                                                                                                                                                                                                                                                                                                                                                                                                                                                                                                                                                                                                                                                                                                                                                                                                                                                                                                                                                                                                                                                                                                                                       |

the submission is accepted. Please make sure it is accurate.

#### Unfunded studies

Enter: *The author(s) received no specific funding for this work.*

#### Funded studies

Enter a statement with the following details:

- Initials of the authors who received each award
- Grant numbers awarded to each author
- The full name of each funder
- URL of each funder website
- Did the sponsors or funders play any role in the study design, data collection and analysis, decision to publish, or preparation of the manuscript?
- **NO** - Include this sentence at the end of your statement: *The funders had no role in study design, data collection and analysis, decision to publish, or preparation of the manuscript.*
- **YES** - Specify the role(s) played.

\* typeset

#### Competing Interests

Use the instructions below to enter a competing interest statement for this submission. On behalf of all authors, disclose any [competing interests](#) that could be perceived to bias this work—acknowledging all financial support and any other relevant financial or non-financial competing interests.

This statement is **required** for submission and **will appear in the published article** if the submission is accepted. Please make sure it is accurate and that any funding sources listed in your Funding Information later in the submission form are also declared in your Financial Disclosure statement.

View published research articles from [PLOS ONE](#) for specific examples.

The authors have declared that no competing interests exist.

### NO authors have competing interests

Enter: *The authors have declared that no competing interests exist.*

### Authors with competing interests

Enter competing interest details beginning with this statement:

*I have read the journal's policy and the authors of this manuscript have the following competing interests: [insert competing interests here]*

\* typeset

### Ethics Statement

Enter an ethics statement for this submission. This statement is required if the study involved:

- Human participants
- Human specimens or tissue
- Vertebrate animals or cephalopods
- Vertebrate embryos or tissues
- Field research

Write "N/A" if the submission does not require an ethics statement.

General guidance is provided below. Consult the [submission guidelines](#) for detailed instructions. **Make sure that all information entered here is included in the Methods section of the manuscript.**

The study was approved by the Internal Review Board non-experimental research of the Erasmus School of Economics, Erasmus University Rotterdam (reference: ESE IRB-NE Application 2020-10 and 2020-05). Participants gave consent to the anonymous collection, processing, archiving and possible publication of their answers before starting the surveys.

**Format for specific study types**

**Human Subject Research (involving human participants and/or tissue)**

- Give the name of the institutional review board or ethics committee that approved the study
- Include the approval number and/or a statement indicating approval of this research
- Indicate the form of consent obtained (written/oral) or the reason that consent was not obtained (e.g. the data were analyzed anonymously)

**Animal Research (involving vertebrate animals, embryos or tissues)**

- Provide the name of the Institutional Animal Care and Use Committee (IACUC) or other relevant ethics board that reviewed the study protocol, and indicate whether they approved this research or granted a formal waiver of ethical approval
- Include an approval number if one was obtained
- If the study involved *non-human primates*, add *additional details* about animal welfare and steps taken to ameliorate suffering
- If anesthesia, euthanasia, or any kind of animal sacrifice is part of the study, include briefly which substances and/or methods were applied

**Field Research**

Include the following details if this study involves the collection of plant, animal, or other materials from a natural setting:

- Field permit number
- Name of the institution or relevant body that granted permission

**Data Availability**

Authors are required to make all data underlying the findings described fully available, without restriction, and from the time of publication. PLOS allows rare exceptions to address legal and ethical concerns. See the [PLOS Data Policy](#) and [FAQ](#) for detailed information.

Yes - all data are fully available without restriction

A Data Availability Statement describing where the data can be found is required at submission. Your answers to this question constitute the Data Availability Statement and **will be published in the article**, if accepted.

**Important:** Stating 'data available on request from the author' is not sufficient. If your data are only available upon request, select 'No' for the first question and explain your exceptional situation in the text box.

Do the authors confirm that all data underlying the findings described in their manuscript are fully available without restriction?

**Describe where the data may be found in full sentences. If you are copying our sample text, replace any instances of XXX with the appropriate details.**

- If the data are **held or will be held in a public repository**, include URLs, accession numbers or DOIs. If this information will only be available after acceptance, indicate this by ticking the box below. For example: *All XXX files are available from the XXX database (accession number(s) XXX, XXX).*
- If the data are all contained **within the manuscript and/or Supporting Information files**, enter the following: *All relevant data are within the manuscript and its Supporting Information files.*
- If neither of these applies but you are able to provide **details of access elsewhere**, with or without limitations, please do so. For example:

*Data cannot be shared publicly because of [XXX]. Data are available from the XXX Institutional Data Access / Ethics Committee (contact via XXX) for researchers who meet the criteria for access to confidential data.*

*The data underlying the results presented in the study are available from (include the name of the third party*

The survey data that support the findings of this study are available from the EUR Data Repository (doi: 10.25397/eur.14356229).

|                                                                                                                                                                                                                                         |                                                                                                                                                                                  |
|-----------------------------------------------------------------------------------------------------------------------------------------------------------------------------------------------------------------------------------------|----------------------------------------------------------------------------------------------------------------------------------------------------------------------------------|
| <p><i>and contact information or URL).</i></p> <ul style="list-style-type: none"><li>• This text is appropriate if the data are owned by a third party and authors do not have permission to share the data.</li></ul> <p>* typeset</p> |                                                                                                                                                                                  |
| Additional data availability information:                                                                                                                                                                                               | Tick here if the URLs/accession numbers/DOIs will be available only after acceptance of the manuscript for publication so that we can ensure their inclusion before publication. |

# Psychological characteristics associated with students' COVID-19 vaccination intention

Annelot Wismans<sup>a, b, \*</sup>, Roy Thurik<sup>a, b, c</sup>, Rui Baptista<sup>d</sup>, Marcus Dejardin<sup>e, f</sup>, Frank Janssen<sup>e</sup>,  
Ingmar Franken<sup>b, g</sup>

## *Affiliations:*

<sup>a</sup> Erasmus School of Economics, Erasmus University Rotterdam, Rotterdam, The Netherlands;

<sup>b</sup> The Erasmus University Rotterdam Institute for Behavior and Biology (EURIBEB), Rotterdam,  
The Netherlands;

<sup>c</sup> Montpellier Business School, Montpellier, France;

<sup>d</sup> CEG-IST, Instituto Superior Técnico, University of Lisbon, Lisboa, Portugal;

<sup>e</sup> Université catholique de Louvain, Louvain-la-Neuve, Belgium;

<sup>f</sup> Université de Namur, Namur, Belgium;

<sup>g</sup> Erasmus School of Social and Behavioural Sciences, Erasmus University Rotterdam, Rotterdam,  
The Netherlands.

\* Corresponding author: [wismans@ese.eur.nl](mailto:wismans@ese.eur.nl) (AW)

## 21 **Abstract**

22 To achieve herd immunity against COVID-19, it is crucial to know the drivers of vaccination intention  
23 and, thereby, vaccination. As the determinants of vaccination differ across vaccines, target groups and  
24 contexts, we investigate COVID-19 vaccination intention using data from university students from three  
25 countries, the Netherlands, Belgium and Portugal, and the 5C model. This model includes five antecedents  
26 of vaccination: Confidence, Complacency, Constraints, Calculation and Collective Responsibility. First,  
27 we show that the majority of students have a positive propensity toward getting vaccinated against  
28 COVID-19, though only 41% of students are completely acceptant. Second, using the 5C model, we show  
29 that ‘Confidence’ and ‘Collective Responsibility’ are most influential in terms of students’ COVID-19  
30 vaccination intention. Using mediation analyses, we show that the perceived risk and effectiveness of the  
31 vaccine as well as trust in the government and health authorities indirectly affect vaccination intention  
32 through ‘Confidence’. The perceived risk of COVID-19 for one’s social circle and altruism, the need to  
33 belong and psychopathy traits indirectly affect vaccination intention through ‘Collective Responsibility’.  
34 Hence, targeting the psychological characteristics associated with ‘Confidence’ and ‘Collective  
35 Responsibility’ can improve the effectiveness of vaccination campaigns among students.

36

## 37 **Introduction**

38 The development of a vaccine has been recognized as a crucial means to halt the spread of  
39 COVID-19. Since effective vaccines against COVID-19 have been developed [1][2], the greatest  
40 challenge is to ensure sufficiently high vaccination rates to establish herd immunity. The  
41 estimates of the needed vaccination rates to achieve herd immunity range from 67% to 95% [3–  
42 5].

43 In 2019, the World Health Organization declared ‘vaccine hesitancy’ one of the top ten  
44 threats to global health [6]. Vaccine hesitancy is defined as the refusal or reluctance to get  
45 vaccinated despite the availability of a vaccine [7]. Vaccine hesitancy has become more



46 problematic in recent decades [8], with the highest levels of skepticism being found in Europe  
47 [9]. In a sample of over 7,000 Europeans, 18.9% of respondents reported being unsure about  
48 getting vaccinated against COVID-19, while 7.2% indicated that they will certainly not get  
49 vaccinated [10]. Even more pessimistic numbers have been shown in a UK and Irish sample, with  
50 only 65% and 69% of respondents fully willing to get vaccinated, respectively [11].

51 Governments and public health agencies must be prepared to address COVID-19 vaccine  
52 hesitancy [12]. Given its novelty, much is still unknown about the acceptance and motivation  
53 behind COVID-19 vaccination. This vaccine differs from previous vaccines in many respects:  
54 development speed, innovativeness of the techniques used, uncertainty regarding the magnitude  
55 and extent of its effectiveness, and potential side effects. As vaccination willingness is context-,  
56 time-, place-, and vaccine-dependent [13], research on COVID-19 vaccination intention and its  
57 antecedents is needed, preferably across a variety of target groups and countries.

58 Previous literature reports potential barriers to vaccine acceptance at different levels [14],  
59 ranging from the political and sociocultural levels to the individual level. At the aggregate level,  
60 in addition to factors such as the availability and cost of vaccines [7], trust in health officials, the  
61 media and governments play an important role in vaccination intention [8]. At the individual  
62 level, studies have, among others, shown the relevance of psychological theories of behavior for  
63 vaccine acceptance, like the theory of planned behavior [15–17]. Several models have been  
64 developed to integrate previous literature on vaccination behavior, such as the 3C [7], 4C [15]  
65 and 5C models [18]. The most recent model, the 5C model, includes five psychological  
66 antecedents of vaccination: Confidence (i.e., trust in the effectiveness and safety of vaccines and  
67 in the system that delivers them), Complacency (i.e., perceived risk of diseases and perceived  
68 level of threat), Constraints (i.e., structural psychological and physical barriers), Calculation (i.e.,  
69 individuals' engagement in extensive information searching) and Collective responsibility (i.e.,  
70 willingness to protect others) [18]. A scale assessing these five drivers explains more variance in

71 vaccination behavior compared to previous measures that have focused almost solely on  
72 Confidence. However, the literature shows that the pattern of the most important Cs within the  
73 5C model varies across vaccines, target groups and countries [18].

74  Regarding COVID-19 vaccination, studies have shown that women, younger adults,  
75 unemployed individuals and those with a lower socioeconomic status are less likely to get  
76 vaccinated [11,19,20]. Moreover, psychological profiles play a role: vaccine-hesitant and  
77 vaccine-resistant individuals are less altruistic, conscientious, more disagreeable, emotionally  
78 unstable, and self-interested than are vaccine-acceptant individuals [11]. Finally, higher COVID-  
79 19 vaccination intention is associated with more positive general and COVID-19 vaccination  
80 beliefs, as well as higher perceived vaccine efficacy and safety [20–22] 

81 The importance of studying psychological variables to understand vaccination intention and  
82 inform effective interventions has been advocated [14]. A deeper understanding of the underlying  
83 psychology of vaccine-resistant and vaccine-hesitant groups can enhance the potential  
84 effectiveness of the public health messages targeting these groups. In this study, we aim to  
85 increase the understanding of COVID-19 vaccination by studying the 5C model and its  
86 psychological drivers. Since younger people are less likely to suffer from the negative health  
87 consequences of COVID-19 infection [23], it is important to know what the main drivers of  
88 getting vaccinated are for these individuals. Based on a sample of university students from the  
89 Netherlands, Belgium, and Portugal, we pursue the following four objectives.

90 *First*, we assess the intention to get vaccinated in our international student sample by using a  
91 seven-point scale, ranging from completely resistant to completely acceptant.

92 *Second*, as shown in previous research, the antecedents of vaccine hesitancy differ across  
93 vaccines, target groups and countries [18]. We are the first to study which Cs—Confidence,  
94 Complacency, Calculation, Constraints, Collective Responsibility (5C’s) – are most important for  
95 COVID-19 vaccination intention in a sample of young adults.

96 *Third*, as stressed by the authors of the 5C model, knowing the relative importance of the Cs  
97 is just a first step, which should be followed by further exploration of the potential levers of these  
98 drivers [18]. Using mediation analyses, we investigate which psychological variables, including  
99 COVID-19 vaccine-related and COVID-19-related attitudes and personality traits, affect  
100 vaccination intention through the 5Cs. This will improve our understanding of vaccination  
101 antecedents and, consequently, for which groups reaching desirable levels of these 5Cs and,  
102 thereby, vaccination intention may be problematic. The mediation analyses we performed are  
103 summarized in Fig 1. Previous studies have shed light on several bivariate relationships between  
104 the 5Cs and psychological constructs [18] (presented by the orange arrows in Fig 1). We study  
105 whether these constructs indeed affect vaccination intention through the suggested C.  
106 Additionally, we study the new indirect relationships represented by the blue arrows in Fig 1.  
107 Direct and total relationships are excluded from Fig 1 for clarity reasons.

108 *Finally*, integrating all results, we formulate advice for governments and public health  
109 officials on which Cs should be targeted while taking their drivers into account. Knowing for  
110 which students' psychological profiles the Cs are less likely to be present should facilitate the  
111 design of targeted public health vaccination campaigns.

112 We find that Confidence and Collective Responsibility are most important in explaining  
113 COVID-19 vaccination among students. The perceived risk and effectiveness of the vaccine and  
114 trust in the government and health authorities indirectly affect vaccination intention through  
115 Confidence. The perceived risk of COVID-19 for one's social circle and altruism, the need to  
116 belong and psychopathy traits indirectly affect vaccination intention through Collective  
117 Responsibility. Thus, vaccination campaigns targeted at students should aim to increase both  
118 Confidence and Collective Responsibility, while considering their underlying psychological  
119 characteristics.

120  
121 **Fig 1. Overview of expected mediation relationships.** Direct effects are excluded for clarity reasons.  
122 (C-19=COVID-19)

## 123 **Materials and methods**

### 124 **Data**

125 The data used in this study are part of the Erasmus University Rotterdam International  
126 COVID-19 Student Survey (EURICSS). This is a longitudinal study on COVID-19-related  
127 behaviors and attitudes among university students from multiple countries [24]. Thus far, data  
128 have been collected at two points in time. For both studies, approval was obtained by the Internal  
129 Review Board of the Erasmus University Rotterdam. All students signed an informed consent  
130 form before starting the survey.

131 During the early days of the pandemic (weeks 17-19, 2020, T1), data were collected for the  
132 first time. Students were approached through university student systems and invitations sent to  
133 university e-mail addresses. In total, data from 7,400 university students in ten countries  
134 worldwide were collected.

135 Data collection for T2 took place between weeks 51 and 52, 2020. Only students who  
136 participated at T1 and studied in the Netherlands, Belgium and Portugal were approached. Other  
137 country samples were not reapproached since the number of students who agreed to be contacted  
138 for follow-up was insufficient to assure large enough samples at T2. Students were contacted  
139 through invitations that were sent to the e-mail addresses they provided at T1. Two reminders  
140 were sent to those students who did not yet finish or start the survey three and seven days after  
141 the first invitation. In total, data were collected from 1,137 students, for a response rate of 39.2%

142 At both T1 and T2, surveys were shared using the online survey software Qualtrics. At T1,  
143 the survey contained questions on COVID-19-related attitudes, compliance with COVID-19  
144 regulations, and several personality traits. For this study, only the T1 data on personality traits are  
145 used. As personality traits are relatively stable over time [25], we suppose that this is not a  
146 problem for the validity of our outcomes. If anything, using multiple measurement times  
147 decreases the probability of common method bias [26]. At T2, the survey contained similar

148 questions on COVID-19-related attitudes and compliance with regulations. In addition, questions  
149 on COVID-19 vaccination intention and vaccination attitudes were posed. Finally, several  
150 personality traits were assessed. The surveys could be completed in English, Dutch or French.

151 Since we mainly use data collected during T2, the dataset for this study contains the 1,137  
152 students who participated both at T1 and T2 and were studying in one of the three countries  
153 mentioned (the Netherlands N=195; Belgium=745; Portugal N=294). On average, students were  
154 22.92 years old, and 59.3% of the sample was female.

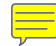

## 155 **Measures**

156 The operationalization of all variables is explained in this section. The means, standard  
157 deviations of all variables and correlations of all variables with vaccination intention and the 5C  
158 scale are presented in Supporting Information S1 Table.

### 159 **Vaccination intention (T2)**

160 Participants were asked the following question: ‘If a coronavirus vaccine that was approved  
161 safe and effective was available to you free at cost, would you get vaccinated?’ Answers could be  
162 given on a seven-point scale: ‘definitely not’ (1), ‘very probably not’ (2), ‘probably not’ (3),  
163 ‘unsure – neutral’ (4), ‘probably yes’ (5), ‘very probably yes’ (6) and ‘definitely yes’ (7). A  
164 higher score thus indicates a higher intention to get vaccinated against COVID-19. The  
165 continuous scale is used instead of grouping students as being acceptant, hesitant, or resistant.  
166 This approach offers a more accurate understanding of vaccination intention, as grouping all  
167 students who indicate somewhere between ‘probably will not’ and ‘probably will’ under hesitant  
168 conditions will lower the unique variation that can be exploited.

### 169 **5C scale (T2)**

170 The 5Cs were assessed using the previously validated 5C scale [18]. The scale consists of 15  
171 items. Each of the Cs—Confidence, Constraints, Calculation, Complacency and Collective  
172 responsibility—is captured by three items. Answers are given on a seven-point Likert scale,

173 ranging from ‘strongly disagree’ to ‘strongly agree’. The scale was adapted to specifically focus  
174 on COVID-19 vaccinations. A French translation was available [27], while a Dutch translation  
175 was performed by two native Dutch speakers individually, after which a consensus meeting took  
176 place to discuss and decide on inconsistencies. All items are scored in a way such that a higher  
177 score indicates a higher degree of the C assessed. The scores of one of the items of the Collective  
178 Responsibility subscale was reversed to be in line with this scoring (‘*When everyone is*  
179 *vaccinated, I don’t have to get vaccinated too*’). Internal consistency, as reflected by Cronbach’s  
180 alpha, is acceptable in our sample: Confidence  $\alpha = .87$ , Complacency  $\alpha = .70$ , Constraints  $\alpha = .69$ ,  
181 Calculation  $\alpha = .76$ , Collective responsibility  $\alpha = .71$ .

### 182 **Perceived risk of the COVID-19 vaccine**

183 Bipolar questions were used to assess the perceived risk of the COVID-19 vaccine. Students  
184 were asked the following: ‘To what extent do you think the following characteristics apply to  
185 COVID-19 vaccines?’ Answers could be given on a seven-point scale using bipolar adjectives,  
186 which is common practice when assessing attitude [28]. An average score was taken for the  
187 following three characteristics: safety (‘very unsafe’ (1) to ‘very safe’ (7)), likeliness of side  
188 effects (‘side effects are very likely’ (1) to ‘side effects are very unlikely’ (7)) and riskiness  
189 (‘very risky’ (1) to ‘not risky at all’ (7)). The score on safety was reversed before analysis, such  
190 that a higher score indicates a higher perceived risk of the vaccine. Internal consistency is very  
191 good ( $\alpha = .85$ ).

### 192 **Perceived effectiveness of the COVID-19 vaccine**

193 A similar question was used to assess the perceived effectiveness of the COVID-19 vaccine.  
194 Students were asked the following: ‘To what extent do you think the following characteristics  
195 apply to COVID-19 vaccines?’ Answers could be given on a seven-point scale, ranging from  
196 ‘very ineffective’ (1) to ‘very effective’ (7).

197

198 **Normative beliefs about the COVID-19 vaccine (T2)**

199 The descriptive social norms in students' social environment regarding getting vaccinated  
200 against COVID-19 was assessed using two questions, distinguishing between the norm among  
201 family and that among friends. The following questions were used: *'In general, if a coronavirus*  
202 *vaccine that was approved safe and effective was available to your friends for free, what would*  
203 *most of your friends do?'* and *'In general, if a coronavirus vaccine that was approved safe and*  
204 *effective was available to your family for free, what would most of your family do?'*. Answers  
205 were given on a scale from 1 (definitely not get vaccinated) to 7 (definitely get vaccinated). An  
206 average of the two answers was taken ( $r=.62, p<.01$ ).

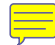

207 **Perceived benefits of the COVID-19 vaccine (T2)**

208 A question was asked on the perceived personal versus social benefits of COVID-19  
209 vaccination using a bipolar seven-point scale. We asked students to complete a statement—  
210 *'Getting vaccinated against the coronavirus will mainly benefit:'*, with answer options ranging  
211 from 'myself' (1) to '(vulnerable) others around me' (7).

212 **Perceived risk of COVID-19 for oneself and for others (T2)**

213 Three questions were asked about the risk of COVID-19 for the students themselves. These  
214 questions asked about the perceived likelihood of getting infected with COVID-19, getting  
215 severely ill if infected and being hospitalized if infected. The same three questions were asked  
216 about the risk of COVID-19 for the friends and family of the student. Average values of the three  
217 items were taken to create a general COVID-19 risk score for oneself and for others. Internal  
218 consistency is acceptable (COVID-19 risk: self  $\alpha=.67$ ; others  $\alpha=.71$ ).

219 **COVID-19 infection (T2)**

220 Students were asked whether they had been infected with the coronavirus before (1=yes,  
221 either confirmed by a test or only expected; 0: no or have not been aware of it).

222

## 223 **General risk attitude (T2)**

224 General risk attitudes were assessed by using the risk propensity scale (RPS) [29], which  
225 consists of seven items. All statements were rated in terms of agreement on a nine-point Likert  
226 scale, ranging from ‘totally disagree’ (1) to ‘totally agree’ (9), except for the final item, which  
227 was rated on a scale ranging from ‘risk avoider’ (1) to ‘risk seeker’ (9). Higher scores indicate a  
228 higher risk-seeking tendency. Internal consistency was good, at  $\alpha=.77$ . A French translation was  
229 previously presented based on a back translation approach [30]. The scale was translated to Dutch  
230 by two native speakers who first translated the scale individually, after which a consensus  
231 meeting took place to discuss and decide on inconsistencies.

## 232 **Delay discounting (T1)**

233 Delay discounting is a behavioral measure related to impulsivity and reflects the degree to  
234 which people are able to delay rewards, i.e., a measure of impatience. Delay discounting was  
235 assessed by the discount rate, with a higher rate reflecting a faster devaluation of delayed rewards  
236 and thus greater impulsivity. To capture the discount rate in a fast and accurate manner, the 5-  
237 trail Adjusting Delay Discounting Task was used, in which students had to make five consecutive  
238 hypothetical choices between receiving €1,000 after a specific delay and receiving €500  
239 directly [31]. The task starts with a delay of 3 weeks, which is increased or decreased based on  
240 previous choices. The discount rate is calculated using the hyperbolic discounting model [32] and  
241 is log-transformed before analysis, as is commonly done in previous research [31,33].

## 242 **Impulsivity (T1)**

243 The Barratt Impulsiveness Scale-Brief (BIS-Brief), which is a short unidimensional version  
244 of the BIS-11, was used to assess the personality construct of impulsivity [34,35]. It consists of 8  
245 items scored on a four-point scale, ranging from ‘rarely/never’ (1) to ‘almost always/always’ (4).  
246 Half of the items were reverse scored. Validated French and Dutch translations were used  
247 [36,37]. The reliability was good, at  $\alpha=.75$ .



248 **Optimism (T1)**

249 Using the Life-Orientation Test-Revised (LOT-R), dispositional optimism was measured  
250 [38]. Both Dutch and French translations were already available [39,40]. The LOT-R consists of  
251 10 items, of which four are filler items. Answers are given on a five-point scale, ranging from  
252 ‘strongly disagree’ (1) to ‘strongly agree’ (5). Higher scores indicate a higher level of  
253 dispositional optimism. Internal consistency was good, as reflected by Cronbach’s alpha ( $\alpha=.81$ ).

254 **Self-efficacy (T1)**

255 General self-efficacy was measured using the General Self-Efficacy Scale (GSES), which  
256 was designed to predict individuals’ coping with daily hassles and adaptation after stressful  
257 events [41]. The scale consists of ten items scored on a four-point scale (1: not at all true; 4:  
258 exactly true). French and Dutch translations were available [42,43]. Internal consistency was very  
259 good, at  $\alpha=.85$ .

260 **Psychopathy (T1)**

261 To assess subclinical psychopathy, the psychopathy subscale of the Short-Dark Triad (SD-3)  
262 was used [44]. The scale generally consists of 9 items. One item (*‘I enjoy having sex with people*  
263 *I hardly know’*) was not included due to cultural controversy. Answers were given on a five-point  
264 scale, ranging from ‘strongly disagree’ (1) to ‘strongly agree’ (5). Previously made Dutch and  
265 French translations were used [45]. Internal consistency was relatively low but acceptable  
266 ( $\alpha=.64$ ).

267 **Altruism (T1)**

268 The altruism (versus antagonism) subscale of the 100-item version of the HEXACO  
269 Personality Inventory-Revised was used, which consists of four questions scored on a five-point  
270 scale (1: ‘strongly disagree’; 5: ‘strongly agree’) [46]. Two questions were reverse coded and  
271 then transformed; higher scores indicate higher levels of altruism (i.e., being sympathetic and  
272 kind). Dutch and French translations were available [47,48]. Internal consistency was low, at  
273  $\alpha=.58$ . Previous studies have found similar low alphas of the altruism subscale while also

274 showing high test-retest reliability and validity [46,49]. There has been a debate on the relevance  
275 of alpha values in evaluating brief personality constructs in such cases [50,51].

## 276 **Need to belong (T2)**

277 The need to belong was assessed using the single-item Need to Belong scale (SIN-B)[52]. It  
278 is shown that the SIN-B explains most of the reliable variance of the longer Need to Belong scale  
279 [52]. The psychometric properties of the scale are good. Participants indicated to what extent they  
280 agreed with the statement '*I have the strong need to belong*' on a five-point scale (1: strongly  
281 disagree; 5: strongly agree). A French translation was taken from a French version of the full  
282 Need to Belong scale [53], and a Dutch translation was made by two native speakers and decided  
283 upon after a consensus meeting.

## 284 **Trust in government and health authorities (T2)**

285 Trust in government was measured using the following item: '*In general, how much trust do*  
286 *you personally have in the [name country] government on a scale from 1 (no trust at all) to 10*  
287 *(full trust)?'* Trust in health authorities was assessed using a similar question and scale: '*In*  
288 *general, how much trust do you personally have in health authorities on a scale from 1 (no trust at*  
289 *all) to 10 (full trust)?'* Since the two scores were highly correlated ( $r=.68$ ), we used an average of  
290 the two scores for analyses.

## 291 **International student (T1)**

292 We inferred that students who answered 'no' to the question '*Have you lived in [name*  
293 *country] for more than 5 years?'* were international students, which was coded with a value of 1.

## 294 **Gender (T1)**

295 Gender was included as a dummy variable, with female (1) and male (0) as answer options.

## 296 **Methodology**

297 The analyses used are linked to the first three objectives of the study. For the first objective,  
298 the percentage of students who indicated a certain degree of willingness to get vaccinated against

300 COVID-19 were calculated. For the second objective, one-sided ordinary least squares (OLS)  
301 regression analyses were conducted with the 5C subscales as independent variables, vaccination  
302 intention as a dependent variable, and country and gender as control variables. We controlled for  
303 country differences by including country dummies, and Dutch students were used as a reference  
304 group. The standardized coefficients of the regression analysis were used to assess the effect sizes  
305 of all Cs to conclude which of these components is most important in explaining COVID-19  
306 vaccination intention among students. Finally, for the third objective, mediation analyses were  
307 conducted using the PROCESS macro in SPSS [54]. The models were estimated for all predictors  
308 of a particular C at the same time; consequently, the direct and indirect effects were estimated  
309 while controlling for the other predictors of the C. All resulting paths were therefore as if they  
310 have been estimated simultaneously using simultaneous equation modeling [54]. Three regression  
311 models were estimated. Model 1 includes the independent variables and controls, with  
312 vaccination intention as the dependent variable. This model presents the total effect for the  
313 independent variables ( $c$ , see Fig 2). Model 2 includes all independent variables and controls,  
314 with the mediator as the dependent variable. This model includes path ‘ $a$ ’ (Fig 2). Finally, Model  
315 3 includes—next to the independent variables and controls—the mediator as a predictor, with  
316 vaccination intention as the dependent variable. This model contains the direct effect ( $c'$ , Fig 2)  
317 and path  $b$  (Fig 2). To estimate the indirect effect, bias-corrected bootstrapping was used to  
318 generate a 95% confidence interval (CI). Bias-corrected bootstrapping is now considered the  
319 standard for testing mediation [55,56]. A common seed was used so that at each run, the  
320 bootstrap confidence intervals were based on the same set of 10,000 resamples from the data  
321 [54]. As the unstandardized indirect effect cannot be interpreted as a measure of effect size [57],  
322 we present standardized indirect effects for all continuous independent variables and partially  
323 standardized indirect effects for all binary independent variables [54,57]. All data analyses were  
324 conducted using IBM SPSS for Windows Version 25.0 [58].

325 **Fig 2. All paths involved in the mediation analyses, excluding covariates**

326

## 327 **Results**

### 328 **COVID-19 vaccination intention among students**

329 Vaccination intention was measured on an ordinal scale, ranging from definitely not to  
330 definitely yes. We asked about intention under the condition that the COVID-19 vaccine was  
331 approved as being safe and effective and could be received free of cost. Fig 3 shows the  
332 percentage per vaccination intention category and cumulative percentages indicated with a  
333 dashed orange line (from positive to negative propensity). While the majority of students  
334 (85.49%) indicated that they intended to get vaccinated within a range between 'probably' and  
335 'definitely', only 40.9% of the students were totally convinced to get vaccinated ('definitely  
336 yes'). Only a very small group was totally resistant to COVID-19 vaccination (1.58%) and  
337 indicated that they will 'definitely not' get vaccinated. Almost 1 out of 10 students (9.41%)  
338 indicated a negative propensity toward COVID-19 vaccination, as they answered within a range  
339 between 'probably not' and 'definitely not'. A total of 5.10% of students indicated being unsure  
340 about getting the COVID-19 vaccination and had neither positive nor negative vaccination  
341 intention. 

342

343 **Fig 3. Vaccination intention in percentages per category and cumulative percentages**

344

### 345 **5C model and COVID-19 vaccination intention**

346 Table 1 presents the results of an OLS regression analysis containing the 5Cs as independent  
347 variables and vaccination intention as the dependent variable while controlling for gender and  
348 country. The table shows that all Cs are significantly related to vaccination intention in the

349 expected direction based on the previous literature. Higher Confidence in the vaccine and higher  
 350 feelings of Collective Responsibility both lead to higher intentions to get vaccinated against  
 351 COVID-19, while higher Complacency, Calculation and Constraints lead to lower COVID-19  
 352 vaccination intentions. Relative to the other Cs, the effect sizes of Confidence ( $B=.32$ ,  $\beta=.33$ ,  
 353  $SE=.03$ ,  $p<.001$ ) and Collective Responsibility ( $B=.46$ ,  $\beta=.35$ ,  $SE=.04$ ,  $p<.001$ ) are largest. We  
 354 therefore infer that the levels of Confidence and Collective Responsibility play the most  
 355 important role in explaining the intention to get vaccinated against COVID-19 among students.

356

357 **Table 1. OLS regression analysis with vaccination intention (1-7) as the dependent variable**

|                                  | B     | 95%-CI        | $\beta$ | SE  | $p$   |
|----------------------------------|-------|---------------|---------|-----|-------|
| Intercept                        | 2.25  | [1.62, 2.88]  |         | .32 | <.001 |
| <b>Confidence</b>                | .32   | [.27, .37]    | .33     | .03 | <.001 |
| <b>Complacency</b>               | -.16  | [-.23, -.09]  | -.12    | .04 | <.001 |
| <b>Constraints</b>               | -.08  | [-.15, -.003] | -.05    | .04 | .042  |
| <b>Calculation</b>               | -.06  | [-.10, -.01]  | -.06    | .02 | .009  |
| <b>Collective Responsibility</b> | .46   | [.39, .53]    | .35     | .04 | <.001 |
| Female                           | -.11  | [-.23, .01]   | -.04    | .06 | .078  |
| Belgium                          | -.003 | [-.17, .16]   | -.001   | .09 | .968  |
| Portugal                         | -.03  | [-.21, .16]   | -.01    | .10 | .788  |
| R <sup>2</sup>                   | 0.54  |               |         |     |       |
| N                                | 1127  |               |         |     |       |

358 *Note:* B is the unstandardized beta, and  $\beta$  is the standardized beta. Dutch students serve as the reference group.

359

### 360 **The 5C model as a mediator in explaining vaccination intention**

361 For the third objective, mediation analyses were conducted [54]. Models were estimated for  
 362 all predictors of a particular C at the same time. In this way, we could ascertain the direct and  
 363 indirect effects of the variables of interest while accounting for the effects of the other predictors  
 364 of the studied C. In Tables 2 to 6, the results of mediation analyses are presented, while each  
 365 table presents the analyses of a particular C. Fig 4 shows an example of all relationships  
 366 presented in the tables, using the example of the perceived safety of the vaccine as an  
 367 independent variable and Confidence as a mediator. In Fig 4, we do not show the covariates.

368 As presented above, Confidence is an important positive driver of COVID-19 vaccination  
369 intention among students. The results of the mediation analyses in Table 2 show that the  
370 perceived risk of the COVID-19 vaccine is most strongly associated with vaccination intention  
371 through Confidence ( $ab=-.17$ ; 95% bias-corrected confidence interval (95% BC-CI) = [-.22, -  
372 .13]), of which all corresponding relationships are visually presented in Fig 4. Additionally, the  
373 perceived effectiveness of the vaccine ( $ab=.09$ ; 95% BC-CI = [.07, .12]) and trust in the  
374 government and health authorities ( $ab=.11$ ; 95% BC-CI = [.08, .14]) are positively and  
375 significantly related to vaccination intention through Confidence. Moreover, a higher descriptive  
376 norm (normative beliefs) surrounding COVID-19 vaccination among students' family and friends  
377 ( $ab=.03$ ., 95% BC-CI = [.02, .05]) is also significantly related to higher COVID-19 vaccination  
378 intention through Confidence, although the indirect effect is small. Finally, the descriptive norm  
379 has a very strong direct effect on vaccination intention, even after controlling for Confidence  
380 ( $\beta=.38$ ,  $p<.01$ ).

381

382 **Table 2. Mediation analyses with Confidence as the mediator and vaccination intention as the**  
 383 **dependent variable (N=1124)**

| Dependent variable                       | Model 1               |       | Model 2    |       | Model 3                  |       | Indirect effect             |
|------------------------------------------|-----------------------|-------|------------|-------|--------------------------|-------|-----------------------------|
|                                          | Vaccination Intention |       | Confidence |       | Vaccination Intention    |       |                             |
| Paths                                    | c (total effect)      |       | a          |       | b and c' (direct effect) |       | a*b                         |
| Coefficient                              | $\beta$               | p     | $\beta$    | p     | $\beta$                  | p     | Indirect effect [95% BC-CI] |
| <b>Predictors</b>                        |                       |       |            |       |                          |       |                             |
| Trust in government & health authorities | .11                   | <.001 | .29        | <.001 | -.004                    | .88   | <b>.11 [.08 , .14]</b>      |
| Normative beliefs                        | .41                   | <.001 | .08        | <.001 | .38                      | <.001 | <b>.03 [.02 , .05]</b>      |
| Perceived risk of vaccine                | -.29                  | <.001 | -.44       | <.001 | -.12                     | <.001 | <b>-.17 [-.22 , -.13]</b>   |
| Perceived effectiveness of vaccine       | .07                   | .01   | .23        | <.001 | -.02                     | .51   | <b>.09 [.07 , .12]</b>      |
| Optimism                                 | -.04                  | .08   | .03        | .08   | -.05                     | .02   | .01 [-.001 , .02]           |
| <b>Control variables</b>                 |                       |       |            |       |                          |       |                             |
| Female                                   | .03                   | .26   | -.04       | .02   | .04                      | .07   |                             |
| Belgium Dummy                            | .08                   | .01   | -.05       | .01   | .10                      | <.001 |                             |
| Portugal Dummy                           | .01                   | .63   | -.02       | .28   | .02                      | .43   |                             |
| <b>Mediator</b>                          |                       |       |            |       |                          |       |                             |
| Confidence                               |                       |       |            |       | .39                      | <.001 |                             |
| R <sup>2</sup>                           | .48                   |       | .76        |       | .51                      |       |                             |

384  
 385 *Note:* The indirect effects that are bold printed do not contain zero in their 95% bias-corrected confidence intervals  
 386 (95% BC-CI) and are interpreted as being statistically significant.  $\beta$  is a standardized coefficient. The indirect effect  
 387 is completely standardized for continuous variables and partially standardized for binary variables.

388  
 389 **Fig 4. Example of all paths involved in mediation analyses using the independent variable ‘perceived**  
 390 **risk of vaccine’ and mediator ‘Confidence’ (Table 2), excluding covariates**

391  
 392 Table 3 presents the analyses involving Calculation as a mediator. The perceived risk of the  
 393 COVID-19 vaccine is significantly and negatively related to vaccination intention through  
 394 Calculation (ab=-.04, 95% BC-CI = [-.06, -.02]). A higher perceived risk of the vaccine is related  
 395 to more Calculation, which is subsequently related to a lower intention to get vaccinated against  
 396 COVID-19. Moreover, a small indirect effect is present for the level of impulsivity, and more  
 397 impulsive students show lower levels of Calculation, which is related to lower vaccination  
 398 intention (ab=.01, 95% BC-CI = [.01, .02]). Other indirect effects, which were expected, are  
 399 insignificant.

400 **Table 3. Mediation analyses with Calculation as the mediator and vaccination intention as the**  
 401 **dependent variable (N=1129)**

|                                | <b>Model 1</b>        |       | <b>Model 2</b> |       | <b>Model 3</b>           |       | <b>Indirect effect</b>      |
|--------------------------------|-----------------------|-------|----------------|-------|--------------------------|-------|-----------------------------|
| Dependent variable             | Vaccination Intention |       | Calculation    |       | Vaccination Intention    |       |                             |
| Paths                          | c (total effect)      |       | a              |       | b and c' (direct effect) |       | a*b                         |
| Coefficient                    | $\beta$               | p     | $\beta$        | p     | $\beta$                  | p     | Indirect effect [95% BC-CI] |
| <b>Predictors</b>              |                       |       |                |       |                          |       |                             |
| Perceived risk of C-19: self   | .06                   | .02   | -.06           | .08   | .06                      | .04   | .01 [-.001 , .01]           |
| Perceived risk of C-19: others | .01                   | .76   | .03            | .37   | .01                      | .68   | -.003 [-.01 , .004]         |
| Perceived risk of vaccine      | -.57                  | <.001 | .35            | <.001 | -.53                     | <.001 | <b>-.04 [-.06 , -.02]</b>   |
| Risk attitude                  | -.07                  | .01   | -.02           | .53   | -.07                     | .01   | .002 [-.01 , .01]           |
| Optimism                       | -.03                  | .18   | .04            | .20   | -.03                     | .23   | -.004 [-.01 , .002]         |
| Impulsivity                    | -.06                  | .03   | -.11           | <.001 | -.07                     | .01   | <b>.01 [.01 , .02]</b>      |
| Psychopathy                    | .002                  | .94   | .02            | .50   | .004                     | .87   | -.002 [-.01 , .004]         |
| <b>Control variables</b>       |                       |       |                |       |                          |       |                             |
| Female                         | -.02                  | .38   | .02            | .47   | -.02                     | .42   |                             |
| Belgium Dummy                  | -.01                  | .77   | .03            | .51   | -.01                     | .83   |                             |
| Portugal Dummy                 | .001                  | .98   | -.03           | .41   | -.003                    | .94   |                             |
| <b>Mediator</b>                |                       |       |                |       |                          |       |                             |
| Calculation                    |                       |       |                |       | -.11                     | <.001 |                             |
| R <sup>2</sup>                 | .34                   |       | .14            |       | .35                      |       |                             |

402 *Note:* The indirect effects that are bold printed do not contain zero in their 95% bias-corrected confidence intervals  
 403 (95% BC-CI) and are interpreted as being statistically significant.  $\beta$  is a standardized coefficient. The indirect effect  
 404 is completely standardized for continuous variables and partially standardized for binary variables.

405  
 406 Analyses with Complacency as a mediator are presented in Table 4. All expected indirect  
 407 effects are significant. Stronger indirect effects are present for the descriptive norm surrounding  
 408 COVID-19 vaccination among students' social circles ( $ab=.12$ , 95% BC-CI = [.09, .15]). A  
 409 higher descriptive norm surrounding COVID-19 vaccination is related to lower Complacency and  
 410 therefore to higher vaccination intention. Moreover, the perceived risk of COVID-19 for both  
 411 students themselves ( $ab=.05$ , 95% BC-CI = [.03, .08]) and for their social environment ( $ab=.05$ ,  
 412 95% BC-CI = [.02, .07]) is associated with higher vaccination intention through lower  
 413 Complacency. Having been infected with COVID-19 is related to higher Complacency and,  
 414 therefore, lower vaccination intention (partially standardized  $ab=-.05$ , 95% BC-CI = [-.11, -.003]).  
 415 Students' general risk attitude ( $ab=-.05$ , 95% BC-CI = [-.08, -.03]) and discount rate ( $ab=-.03$ ,



416 95% BC-CI = [-.05, -.01]) are also indirectly negatively associated with COVID-19 vaccination  
 417 intention through higher Complacency.

418

419 **Table 4. Mediation analyses with Complacency as the mediator and vaccination intention as the**  
 420 **dependent variable (N=1128)**

|                                | <b>Model 1</b>        |          | <b>Model 2</b> |          | <b>Model 3</b>           |          | <b>Indirect effect</b>      |
|--------------------------------|-----------------------|----------|----------------|----------|--------------------------|----------|-----------------------------|
| Dependent variable             | Vaccination Intention |          | Complacency    |          | Vaccination Intention    |          |                             |
| Paths                          | c (total effect)      |          | a              |          | b and c' (direct effect) |          | a*b                         |
| Coefficient                    | $\beta$               | <i>p</i> | $\beta$        | <i>p</i> | $\beta$                  | <i>p</i> | Indirect effect [95% BC-CI] |
| <b>Predictors</b>              |                       |          |                |          |                          |          |                             |
| Perceived risk of C-19: self   | .03                   | .33      | -.15           | <.001    | -.03                     | .33      | <b>.05 [.03 , .08]</b>      |
| Perceived risk of C-19: others | .04                   | .13      | -.12           | <.001    | .0003                    | .99      | <b>.05 [.02 , .07]</b>      |
| Normative beliefs              | .60                   | <.001    | -.33           | <.001    | .49                      | <.001    | <b>.12 [.09 , .15]</b>      |
| C-19 Infection                 | -.03                  | .24      | .06            | .02      | -.01                     | .76      | <b>-.05 [-.11 , -.003]</b>  |
| Risk attitude                  | -.07                  | .003     | .15            | <.001    | -.02                     | .40      | <b>-.05 [-.08 , -.03]</b>   |
| Delay discounting              | -.02                  | .47      | .09            | <.001    | .01                      | .51      | <b>-.03 [-.05 , -.01]</b>   |
| <b>Control variables</b>       |                       |          |                |          |                          |          |                             |
| Female                         | -.05                  | .08      | -.04           | .18      | -.06                     | .01      |                             |
| Belgium Dummy                  | .02                   | .60      | -.11           | .003     | -.02                     | .49      |                             |
| Portugal Dummy                 | -.01                  | .75      | -.15           | <.001    | -.06                     | .05      |                             |
| <b>Mediator</b>                |                       |          |                |          |                          |          |                             |
| Complacency                    |                       |          |                |          | -.35                     | <.001    |                             |
| R <sup>2</sup>                 | .38                   |          | .23            |          | .48                      |          |                             |

421 *Note:* The indirect effects that are bold printed do not contain zero in their 95% bias-corrected confidence intervals  
 422 (95% BC-CI) and are interpreted as being statistically significant.  $\beta$  is a standardized coefficient. The indirect effect  
 423 is completely standardized for continuous variables and partially standardized for binary variables.

424

425 Table 5 shows the mediation analyses with Constraints as a mediator. We only find a small  
 426 significant indirect effect of self-efficacy ( $ab=.03$ , 95% BC-CI = [.003, .07]). Students with a  
 427 higher level of self-reported self-efficacy perceive fewer constraints, which is related to higher  
 428 vaccination intention. However, a significant direct effect of self-efficacy on vaccination  
 429 intention remains after controlling for Constraints ( $\beta=-.09$ ,  $p<.01$ ). Optimism, impulsivity and  
 430 being an international student do not indirectly relate to vaccination intention through Calculation  
 431 as the confidence intervals corresponding to these variables contain zero.

432 **Table 5. Mediation analyses with Constraints as the mediator and vaccination intention as the**  
 433 **dependent variable (n=1129)**

| Dependent variable       | Model 1               |       | Model 2     |     | Model 3                  |       | Indirect effect             |
|--------------------------|-----------------------|-------|-------------|-----|--------------------------|-------|-----------------------------|
|                          | Vaccination Intention |       | Constraints |     | Vaccination Intention    |       |                             |
| Paths                    | c (total effect)      |       | a           |     | b and c' (direct effect) |       | a*b                         |
| Coefficient              | $\beta$               | p     | $\beta$     | p   | $\beta$                  | p     | Indirect effect [95% BC-CI] |
| <b>Predictors</b>        |                       |       |             |     |                          |       |                             |
| Optimism                 | .02                   | .62   | -.05        | .11 | -.01                     | .78   | .02 [-.003 , .05]           |
| Impulsivity              | -.11                  | <.001 | .03         | .42 | -.10                     | <.001 | -.01 [-.04 , .02]           |
| Self-efficacy            | -.06                  | .10   | -.07        | .03 | -.09                     | .003  | <b>.03 [.003 , .07]</b>     |
| International Student    | .01                   | .64   | .06         | .05 | .04                      | .11   | -.09 [-.18 , .01]           |
| <b>Control variables</b> |                       |       |             |     |                          |       |                             |
| Female                   | -.10                  | <.001 | .01         | .63 | -.10                     | <.001 |                             |
| Belgium Dummy            | -.08                  | .07   | .05         | .22 | -.05                     | .16   |                             |
| Portugal Dummy           | .06                   | .14   | -.09        | .03 | .02                      | .60   |                             |
| <b>Mediator</b>          |                       |       |             |     |                          |       |                             |
| Constraints              |                       |       |             |     | -.47                     | <.001 |                             |
| R <sup>2</sup>           | .05                   |       | .03         |     | .26                      |       |                             |

434 *Note:* The indirect effects that are bold printed do not contain zero in their 95% bias-corrected confidence intervals  
 435 (95% BC-CI) and are interpreted as being statistically significant.  $\beta$  is a standardized coefficient. The indirect effect  
 436 is completely standardized for continuous variables and partially standardized for binary variables.

437

438 Analyses with Collective Responsibility as a mediator are presented in Table 6. We show  
 439 that the risk of COVID-19 for family and friends, as perceived by students, is positively related to  
 440 vaccination intention through Collective Responsibility ( $ab=.08$ , 95% BC-CI = [.04, .13]).  
 441 Moreover, several personality traits are indirectly associated with vaccination intention through  
 442 Collective Responsibility. Higher levels of psychopathy traits are negatively related to  
 443 vaccination intention through lower levels of Collective Responsibility ( $ab=-.08$ , 95% BC-CI = -  
 444 .13, -.04]). Conversely, higher levels of altruism ( $ab=.06$ , 95% BC-CI = [.01, .10]) and the need  
 445 to belong ( $ab=.07$ , 95% BC-CI = [.03, .11]) positively indirectly relate to vaccination intention  
 446 through Collective Responsibility.

447 **Table 6. Mediation analyses with Collective Responsibility as the mediator and vaccination intention**  
 448 **as the dependent variable (n=1127)**

|                                  | <b>Model 1</b>        |          | <b>Model 2</b>            |          | <b>Model 3</b>           |          | <b>Indirect effect</b>      |
|----------------------------------|-----------------------|----------|---------------------------|----------|--------------------------|----------|-----------------------------|
| Dependent variable               | Vaccination Intention |          | Collective Responsibility |          | Vaccination Intention    |          |                             |
| Paths                            | c (total effect)      |          | a                         |          | b and c' (direct effect) |          | a*b                         |
| Coefficient                      | $\beta$               | <i>p</i> | $\beta$                   | <i>p</i> | $\beta$                  | <i>p</i> | Indirect effect [95% BC-CI] |
| <b>Predictors</b>                |                       |          |                           |          |                          |          |                             |
| Perceived risk of C-19: others   | .03                   | .27      | .13                       | <.001    | -.05                     | .04      | <b>.08 [.04 , .13]</b>      |
| Benefits vaccine: self vs others | -.04                  | .13      | .05                       | .09      | -.08                     | <.001    | .03 [-.01 , .07]            |
| Pyschopathy                      | -.10                  | <.001    | -.13                      | <.001    | -.02                     | .35      | <b>-.08 [-.13 , -.04]</b>   |
| Altruism                         | .01                   | .66      | .09                       | .01      | -.04                     | .09      | <b>.06 [.01 , .10]</b>      |
| Need to Belong                   | .14                   | <.001    | .11                       | <.001    | .06                      | .01      | <b>.07 [.03 , .11]</b>      |
| <b>Control variables</b>         |                       |          |                           |          |                          |          |                             |
| Female                           | -.14                  | <.001    | -.08                      | .01      | -.08                     | <.001    |                             |
| Belgium Dummy                    | -.14                  | <.001    | -.09                      | .04      | -.09                     | .01      |                             |
| Portugal Dummy                   | .03                   | .41      | .06                       | .12      | -.01                     | .82      |                             |
| <b>Mediator</b>                  |                       |          |                           |          |                          |          |                             |
| Collective Responsibility        |                       |          |                           |          | .65                      | <.001    |                             |
| R <sup>2</sup>                   | .07                   |          | .08                       |          | .45                      |          |                             |

449 *Note:* The indirect effects that are bold printed do not contain zero in their 95% bias-corrected confidence intervals  
 450 (95% BC-CI) and are interpreted as being statistically significant.  $\beta$  is a standardized coefficient. The indirect effect  
 451 is completely standardized for continuous variables and partially standardized for binary variables.

452

## 453 Discussion

454 According to the results, the majority of the 1,137 Dutch, Belgian and Portuguese students  
 455 do not have a full and definite intention to get vaccinated against COVID-19. More than half of  
 456 them (57.7%) fall on a continuum between leaning toward acceptance and leaning toward  
 457 resistance. Although a large majority of our sample has a positive propensity toward getting  
 458 vaccinated against COVID-19 (85% of students indicate intentions between ‘probably’ and  
 459 ‘definitely’), the group of students who are completely acceptant of the vaccine (41%) is quite  
 460 small. At the same time, only a very small group indicates to refuse a vaccination (1.6%). To  
 461 achieve herd immunity through vaccination, it is crucial that more students shift their intention  
 462 toward a more positive definite answer. Most gains can be achieved by targeting students who

463 already have a positive propensity toward vaccination but are not completely certain. As previous  
464 studies mostly use yes/no scales to assess vaccination intention, it is not possible to directly  
465 compare our results to those of previous studies. For example, using a yes/no format, 95% of  
466 respondents indicate a willingness to be vaccinated against COVID-19 in a sample of students in  
467 Italy [59].

## 468 **5C drivers of students' COVID-19 vaccination intention**

469 We show that all five components of the 5C model—Confidence, Calculation, Complacency,  
470 Constraints and Collective Responsibility—are related to COVID-19 vaccination among  
471 students. Confidence, i.e., the degree of trust in the vaccine and the system that delivers it, and  
472 Collective Responsibility, i.e., the willingness to protect others by getting vaccinated, are the  
473 strongest predictors of COVID-19 vaccination intention. This suggests that campaigns targeted at  
474 increasing vaccination intention among young adults will likely be most successful when focused  
475 on enhancing the levels of both Confidence and Collective Responsibility. Smaller negative links  
476 are present between vaccination intention and Complacency, Constraints, and Calculation.

## 477 **Psychological profiles underlying COVID-19 vaccination intention**

478 We show that psychological profiles indeed play an important role in explaining vaccination  
479 intention. As vaccination campaigns will most likely be most successful when targeted at  
480 Confidence and Collective Responsibility, we discuss which psychological variables underlie  
481 these drivers and should therefore be considered when designing interventions.

482 First, we show that the perceived risk and effectiveness of the vaccine both affect vaccination  
483 intention through changes in Confidence levels. The level of Confidence will likely be lower for  
484 students who perceive the vaccine as being riskier (e.g., less safe and with a higher risk of side  
485 effects) and less effective. Moreover, trust in the government and health authorities plays an  
486 important role in explaining vaccination intention through Confidence. Students with lower trust  
487 in these institutions report lower levels of Confidence, which translates into lower vaccination

488 intention. Finally, the descriptive norm in students' environment—the degree to which family  
489 and friends intend to get vaccinated—has a small effect on intention through Confidence.  
490 However, we show that the descriptive norm has a strong direct relationship with vaccination  
491 intention.

492       With respect to Collective Responsibility, it is evident that the perceived risk of COVID-19  
493 for people in a student's social circle indirectly affects his/her vaccination intention through  
494 Collective Responsibility. Students who perceive the risk of COVID-19 for their environment as  
495 being low indicate a lower intention to get vaccinated against COVID-19, motivated by a lower  
496 willingness to protect others. Moreover, we show that personality plays an important role in  
497 explaining the perception of vaccination as a Collective Responsibility. Traits of psychopathy,  
498 which are related to antisocial behavior caused by deficits in empathy, emotion, and self-control  
499 [44], negatively relate to Collective Responsibility and, therefore, to a lower intention to get  
500 vaccinated. Similarly, students with more altruistic personalities, e.g., those who feel more  
501 sympathy toward others and want to help those in need, have a higher intention to get vaccinated  
502 against COVID-19, caused by higher levels of Collective Responsibility. Additionally, the degree  
503 to which students feel the 'need to belong' indirectly relates to higher vaccination intention  
504 through Collective Responsibility. The need to belong relates both to the human needs of wanting  
505 to affiliate with others and wanting to be accepted by others [60]. We expect that both a need to  
506 be in contact with others at risk for COVID-19 without worrying and signaling prosocial  
507 behavior to be accepted by others underlie the indirect positive relationship between the need to  
508 belong and vaccination intention through Collective Responsibility.

## 509 **Implications for vaccination campaigns and interventions**

510       What implications can these results have for public health policy? First, the data suggest that  
511 seeking to increase both Confidence and Collective Responsibility simultaneously will be

512 worthwhile since vaccination interventions that address multiple underlying drivers have been  
513 shown to be more successful [61]. We provide several suggestions for both drivers separately.

514 In influencing Confidence, it is important to influence the perceived safety and effectiveness  
515 of the COVID-19 vaccine. In our survey, the most prevalent reasons for not getting vaccinated  
516 were related to worries about safety, side effects, development speed and the wish for the vaccine  
517 to be proven effective and safe over a longer period. By challenging the misinformation  
518 surrounding the vaccine and providing factual information on, for example, the reasons that the  
519 vaccine was able to be developed so fast, Confidence in the vaccine can be increased. However, it  
520 is important to think about how and who communicates this information because, for people with  
521 a strong prior opinion, a correction of information could backfire and lead to even more divided  
522 attitudes [62]. Since we showed that low Confidence is related to lower trust in the government  
523 and health authorities, information about safety and efficacy should preferably be communicated  
524 by people not within traditional positions of authority. A good strategy would be to use  
525 ‘surprising validators’, i.e., people seen as credible to the target audience but who are not  
526 expected to share this information [62]. To reach young adults, one could, for example, think of  
527 campaigns including peers or celebrities.

528 We find Collective Responsibility to be the strongest predictor of COVID-19 vaccination  
529 among students. It is logical that this is an important driver for this group since students are less  
530 at risk of developing severe health consequences if infected by COVID-19. Willingness to protect  
531 others is thus a strong motivator. We show that the perceived risk of COVID-19 for others in a  
532 student’s social circle indirectly affects his or her vaccination intention through Collective  
533 Responsibility. Students with at-risk family members will be more likely to get vaccinated to  
534 protect those around them. Vaccination campaigns aimed at young adults may thus be more  
535 successful by showing the risks for those in the close environment of students. Explaining the  
536 concept of herd immunity through vaccination is an important approach, as was also

537 experimentally shown [63]. Students can and should be made aware that they are not just making  
538 an individual decision but also a collective decision when deciding whether to get vaccinated. To  
539 increase identification, campaigns should seek to explain why certain groups are unable to get  
540 vaccinated (e.g., people with allergic reaction to vaccines, pregnant or breastfeeding women, and  
541 those aged under 18 years). Nevertheless, our results also indicate that students with less  
542 altruistic, emphatic, and social personalities will be less likely to feel Collective Responsibility.  
543 Influencing these traits is likely to be very difficult, maybe even impossible. As these students  
544 feel less empathy toward others, campaigns focused on stressing the prosocial consequences of  
545 vaccination may not be sufficient to influence these groups as strongly and could even promote  
546 the idea of free riding [64]. Therefore, it remains important to communicate the personal risks of  
547 COVID-19 for young adults, for example, by communicating the possibilities of long-lasting  
548 adverse consequences of COVID-19, also known as ‘long COVID’ [65].

549       In addition to positively affecting vaccination intention through Confidence and  
550 Complacency, we show that the descriptive norm has a strong direct effect on vaccination  
551 intention. Descriptive norms have been proven to be strong drivers of behavior, especially in  
552 times of uncertainty [66]. Vaccination campaigns could be more successful if they make the norm  
553 among students more salient by stressing that the majority of students intend to get vaccinated.

554       In most countries, young adults will be the last in line for vaccination. Although this makes  
555 sense from a health perspective, governments should realize that by the time students must  
556 actively decide whether to get vaccinated, the vaccination strategy may have already led to  
557 decreased infection rates and, therefore, also to a lower perceived risk of COVID-19.

558 Importantly, when family members are already vaccinated, the level of Collective Responsibility  
559 may decrease through a lower perceived risk of COVID-19 for others. It is therefore vital that  
560 campaigns focused on young adults start early on since the necessity of vaccination is now most  
561 salient, and therefore, positive intentions can be formulated. Studies show that once a strong

562 enough intention to get vaccinated is formed, this likely translates into action [67]. In terms of  
563 policy, to enhance the transition from intention to behavior, the process of getting vaccinated  
564 should be easy, fast and without unforeseen barriers [68].

## 565 **Limitations and future research**

566 The study has several limitations. *First*, we measure vaccination intention and not actual  
567 vaccination behavior. As the intention-behavior gap shows us that not all intentions translate into  
568 behavior [69], it would be interesting to research whether our results also hold with actual  
569 vaccination behavior as the dependent variable. *Second*, we study a highly educated sample of  
570 university students. Although this provides a fairer picture of the drivers of vaccination intention  
571 among young adults than studies employing a sample of the general population, the results may  
572 not be completely generalizable to all young adults. Although we expect the drivers of  
573 vaccination intention to be generalizable across this group, it may be higher in our study, as  
574 previous studies have shown higher education to be positively related to COVID-19 vaccination  
575 intention [70]. *Third*, as discussed, vaccination intention is context- and time-dependent. Since  
576 we use a snapshot of vaccination intention assessed in December 2020, attitudes and intention  
577 toward vaccination may have shifted over time. *Finally*, for future research, an important next  
578 step will be to design and test which interventions have the best outcomes in both experimental  
579 and real-life settings.

580 Despite its limitations, our study provides governments and public health officials with much  
581 needed levers of the important drivers of COVID-19 vaccination intention among students. Given  
582 the suggested rate of COVID-19 vaccination acceptance in our sample, we hope that our findings  
583 will contribute to the designing and improving of effective public health messaging to increase  
584 the acceptance above the percentages needed to achieve herd immunity.

585

586



## 587 **Acknowledgements**

588 We thank Karl Wennberg, Srebrenka Letina, Enrico Santarelli, Andrew Burke, Jinia  
589 Mukerjee, José María Millán, Jorge Barrientos Marín, Joern Block and Olivier Torrès for their  
590 involvement in the T1 data collection in countries not used in the present study.

## 591 **References**

- 592 1. Polack FP, Thomas SJ, Kitchin N, Absalon J, Gurtman A, Lockhart S, et al. Safety and  
593 efficacy of the BNT162b2 mRNA Covid-19 vaccine. *New England Journal of Medicine*.  
594 2020;383: 2603–2615.
- 595 2. Voysey M, Clemens SAC, Madhi SA, Weckx LY, Folegatti PM, Aley PK, et al. Safety  
596 and efficacy of the ChAdOx1 nCoV-19 vaccine (AZD1222) against SARS-CoV-2: an  
597 interim analysis of four randomised controlled trials in Brazil, South Africa, and the UK.  
598 *The Lancet*. 2021;397: 99–111.
- 599 3. Mills Melinda, Rahal Charles, Brazel David, Yan Jiani, Gieysztor Sofia. COVID-19  
600 vaccine deployment: Behaviour, ethics, misinformation and policy strategies. 2020.
- 601 4. Randolph HE, Barreiro LB. Herd immunity: understanding COVID-19. *Immunity*.  
602 2020;52: 737–741.
- 603 5. Anderson RM, Vegvari C, Truscott J, Collyer BS. Challenges in creating herd immunity  
604 to SARS-CoV-2 infection by mass vaccination. *The Lancet*. 2020;396: 1614–1616.
- 605 6. World Health Organization. Ten threats to global health in 2019. 2019. Available:  
606 <https://www.who.int/news-room/spotlight/ten-threats-to-global-health-in-2019>
- 607 7. MacDonald NE. Vaccine hesitancy: Definition, scope and determinants. *Vaccine*.  
608 2015;33: 4161–4164. doi:10.1016/j.vaccine.2015.04.036
- 609 8. Dubé E, Laberge C, Guay M, Bramadat P, Roy R, Bettinger JA. Vaccine hesitancy.  
610 *Human Vaccines & Immunotherapeutics*. 2013;9: 1763–1773. doi:10.4161/hv.24657
- 611 9. Larson HJ, de Figueiredo A, Xiaohong Z, Schulz WS, Verger P, Johnston IG, et al. The  
612 State of Vaccine Confidence 2016: Global Insights Through a 67-Country Survey.  
613 *EBioMedicine*. 2016;12: 295–301. doi:<https://doi.org/10.1016/j.ebiom.2016.08.042>
- 614 10. Neumann-Böhme S, Varghese NE, Sabat I, Barros PP, Brouwer W, van Exel J, et al.  
615 Once we have it, will we use it? A European survey on willingness to be vaccinated  
616 against COVID-19. *The European Journal of Health Economics*. 2020;21: 977–982.
- 617 11. Murphy J, Vallières F, Bentall RP, Shevlin M, McBride O, Hartman TK, et al.  
618 Psychological characteristics associated with COVID-19 vaccine hesitancy and resistance  
619 in Ireland and the United Kingdom. *Nature Communications*. 2021;12.  
620 doi:10.1038/s41467-020-20226-9
- 621 12. Lazarus J v, Ratzan SC, Palayew A, Gostin LO, Larson HJ, Rabin K, et al. A global  
622 survey of potential acceptance of a COVID-19 vaccine. *Nature Medicine*. 2020.  
623 doi:10.1038/s41591-020-1124-9
- 624 13. Dubé E, Gagnon D, Nickels E, Jeram S, Schuster M. Mapping vaccine hesitancy—  
625 Country-specific characteristics of a global phenomenon. *Vaccine*. 2014;32: 6649–6654.  
626 doi:<https://doi.org/10.1016/j.vaccine.2014.09.039>
- 627 14. Schmid P, Rauber D, Betsch C, Lidolt G, Denker M-L. Barriers of Influenza Vaccination  
628 Intention and Behavior – A Systematic Review of Influenza Vaccine Hesitancy, 2005 –  
629 2016. *PLOS ONE*. 2017;12. doi:10.1371/journal.pone.0170550

- 630 15. Betsch C, Böhm R, Chapman GB. Using Behavioral Insights to Increase Vaccination  
631 Policy Effectiveness. *Policy Insights from the Behavioral and Brain Sciences*. 2015;2: 61–  
632 73. doi:10.1177/2372732215600716
- 633 16. Gerend MA, Shepherd JE. Predicting human papillomavirus vaccine uptake in young  
634 adult women: comparing the health belief model and theory of planned behavior. *Annals*  
635 *of Behavioral Medicine*. 2012;44: 171–180.
- 636 17. Xiao X, Wong RM. Vaccine hesitancy and perceived behavioral control: A meta-  
637 analysis. *Vaccine*. 2020;38. doi:10.1016/j.vaccine.2020.04.076
- 638 18. Betsch C, Schmid P, Heinemeier D, Korn L, Holtmann C, Böhm R. Beyond confidence:  
639 Development of a measure assessing the 5C psychological antecedents of vaccination.  
640 *PloS one*. 2018;13. doi:10.1371/journal.pone.0208601
- 641 19. Malik AA, McFadden SM, Elharake J, Omer SB. Determinants of COVID-19 vaccine  
642 acceptance in the US. *EClinicalMedicine*. 2020;26: 100495.  
643 doi:https://doi.org/10.1016/j.eclinm.2020.100495
- 644 20. Rhodes A, Hoq M, Measey M-A, Danchin M. Intention to vaccinate against COVID-19  
645 in Australia. *The Lancet Infectious Diseases*. 2020.
- 646 21. Karlsson LC, Soveri A, Lewandowsky S, Karlsson L, Karlsson H, Nolvi S, et al. Fearing  
647 the disease or the vaccine: The case of COVID-19. *Personality and Individual Differences*.  
648 2021;172: 110590. doi:https://doi.org/10.1016/j.paid.2020.110590
- 649 22. Sherman SM, Smith LE, Sim J, Amlôt R, Cutts M, Dasch H, et al. COVID-19  
650 vaccination intention in the UK: results from the COVID-19 vaccination acceptability  
651 study (CoVAccS), a nationally representative cross-sectional survey. *Human Vaccines &*  
652 *Immunotherapeutics*. 2020; 1–10. doi:10.1080/21645515.2020.1846397
- 653 23. Verity R, Okell LC, Dorigatti I, Winskill P, Whittaker C, Imai N, et al. Estimates of the  
654 severity of coronavirus disease 2019: a model-based analysis. *The Lancet Infectious*  
655 *Diseases*. 2020;20. doi:10.1016/S1473-3099(20)30243-7
- 656 24. Wismans A, Letina S, Thurik R, Wennberg K, Franken I, Baptista R, et al. Hygiene and  
657 social distancing as distinct public health related behaviours among university students  
658 during the COVID-19 Pandemic. *Social Psychological Bulletin*. 2020;15: 1–26.
- 659 25. Costa Jr PT, McCrae RR. Set like plaster? Evidence for the stability of adult personality.  
660 1994.
- 661 26. Podsakoff PM, MacKenzie SB, Podsakoff NP. Sources of method bias in social science  
662 research and recommendations on how to control it. *Annual review of psychology*.  
663 2012;63: 539–569.
- 664 27. Guillot C, Phirmis L, Servy H, Duputel B, Bauduceau B, Sultan A. Représentations et  
665 pratiques de vaccinations : enquête auprès de 3721 personnes diabétiques. *Revue*  
666 *d'Épidémiologie et de Santé Publique*. 2020;68: S81–S82.  
667 doi:https://doi.org/10.1016/j.respe.2020.04.036
- 668 28. Ajzen I. Constructing a theory of planned behavior questionnaire. 2006 [cited 16 Feb  
669 2021]. Available: <http://people.umass.edu/aizen/pdf/tpb.measurement.pdf>.
- 670 29. Meertens RM, Lion R. Measuring an Individual's Tendency to Take Risks: The Risk  
671 Propensity Scale1. *Journal of Applied Social Psychology*. 2008;38: 1506–1520.  
672 doi:https://doi.org/10.1111/j.1559-1816.2008.00357.x
- 673 30. Ferrero MCA, Bessière V. The Implementation of Creative ideas: an Experimental  
674 Investigation of the Role of Entrepreneurs' Confidence and Risk-Taking Behaviour.  
675 *Frontiers of Entrepreneurship Research*. 2017;37: 11.
- 676 31. Koffarnus MN, Bickel WK. A 5-trial adjusting delay discounting task: accurate discount  
677 rates in less than one minute. *Experimental and clinical psychopharmacology*. 2014;22:  
678 222.
- 679 32. Mazur JE. An adjusting procedure for studying delayed reinforcement. *Commons, ML;*  
680 *Mazur, JE; Nevin, JA*. 1987; 55–73.

- 681 33. Yoon JH, Higgins ST. Turning k on its head: Comments on use of an ED50 in delay  
682 discounting research. *Drug and Alcohol Dependence*. 2008;95: 169–172.
- 683 34. Steinberg L, Sharp C, Stanford MS, Tharp AT. New tricks for an old measure: The  
684 development of the Barratt Impulsiveness Scale–Brief (BIS-Brief). *Psychological*  
685 *assessment*. 2013;25: 216.
- 686 35. Patton JH, Stanford MS, Barratt ES. Factor structure of the Barratt impulsiveness scale.  
687 *Journal of clinical psychology*. 1995;51: 768–774.
- 688 36. Bayle FJ, Bourdel MC, Caci H, Gorwood P, Chignon JM, Ades J, et al. Factor analysis of  
689 french translation of the Barratt impulsivity scale (BIS-10). *Canadian journal of psychiatry*  
690 *Revue canadienne de psychiatrie*. 2000;45: 156–165.
- 691 37. Lijffijt M, Barratt ES. Unpublished Translation of the Barratt Impulsiveness Scale. 2005.
- 692 38. Scheier MF, Carver CS, Bridges MW. Distinguishing optimism from neuroticism (and  
693 trait anxiety, self-mastery, and self-esteem): a reevaluation of the Life Orientation Test.  
694 *Journal of personality and social psychology*. 1994;67: 1063.
- 695 39. ten Klooster PM, Weekers AM, Eggelmeijer F, van Woerkom JM, Drossaert C, Taal E,  
696 et al. Optimisme en/of pessimisme: factorstructuur van de Nederlandse Life Orientation  
697 Test-Revised. *Psychologie en Gezondheid*. 2010;38: 89–100.
- 698 40. Trottier C, Trudel P, Halliwell WR. Présentation des deux principales théories nord-  
699 américaines sur l'optimisme. *Staps*. 2007; 9–28.
- 700 41. Schwarzer R, Jerusalem M. Generalized self-efficacy scale. *Measures in health*  
701 *psychology: A user's portfolio Causal and control beliefs*. 1995;1: 35–37.
- 702 42. Teeuw B, Schwarzer R, Jerusalem M. Dutch general self-efficacy scale. 1994. Available:  
703 <http://userpage.fu-berlin.de/~health/dutch.htm>
- 704 43. Dumont M, Schwarzer R, Jerusalem M. French Adaptation of the General Self-Efficacy  
705 Scale-Auto-efficacité Généralisée. 2000. Available: [userpage. fuberlin. de/~ health/french.](http://userpage.fuberlin.de/~health/french.htm)  
706 [htm](http://userpage.fuberlin.de/~health/french.htm)
- 707 44. Jones DN, Paulhus DL. Introducing the short dark triad (SD3) a brief measure of dark  
708 personality traits. *Assessment*. 2014;21: 28–41.
- 709 45. Atitsoybe KA, Hansenne M, Pari P, Rossier J. Normal Personality, the Dark Triad,  
710 Proactive Attitude and Perceived Employability: A Cross-Cultural Study in Belgium,  
711 Switzerland and Togo. *Psychologica Belgica*. 2020;60: 217.
- 712 46. Lee K, Ashton MC. Psychometric properties of the HEXACO-100. *Assessment*. 2018;25:  
713 543–556.
- 714 47. Boies K, Yoo T-Y, Ebacher A, Lee K, Ashton MC. Validity studies psychometric  
715 properties of scores on the French and Korean versions of the Hexaco personality  
716 inventory. *educational and Psychological Measurement*. 2004;64: 992–1006.
- 717 48. de Vries RE, Lee K, Ashton MC. The Dutch HEXACO Personality Inventory:  
718 Psychometric properties, self–other agreement, and relations with psychopathy among low  
719 and high acquaintanceship dyads. *Journal of personality assessment*. 2008;90: 142–151.
- 720 49. Romero E, Villar P, López-Romero L. Assessing six factors in Spain: Validation of the  
721 HEXACO-100 in relation to the Five Factor Model and other conceptually relevant  
722 criteria. *Personality and Individual Differences*. 2015;76: 75–81.  
723 [doi:https://doi.org/10.1016/j.paid.2014.11.056](https://doi.org/10.1016/j.paid.2014.11.056)
- 724 50. de Vries RE. The 24-item Brief HEXACO Inventory (BHI). *Journal of Research in*  
725 *Personality*. 2013;47: 871–880. [doi:https://doi.org/10.1016/j.jrp.2013.09.003](https://doi.org/10.1016/j.jrp.2013.09.003)
- 726 51. McCrae RR, Kurtz JE, Yamagata S, Terracciano A. Internal consistency, retest  
727 reliability, and their implications for personality scale validity. *Personality and social*  
728 *psychology review*. 2011;15: 28–50.
- 729 52. Nichols AL, Webster GD. The single-item need to belong scale. *Personality and*  
730 *Individual Differences*. 2013;55: 189–192. [doi:https://doi.org/10.1016/j.paid.2013.02.018](https://doi.org/10.1016/j.paid.2013.02.018)

- 731 53. Sanquirgo N, Oberle D, Chekroun P. The Need to Belong scale: French validation and  
732 impact on reactions to deviance. *Annee Psychologique*. 2012;112: 85–113.
- 733 54. Hayes AF. Introduction to mediation, moderation, and conditional process analysis: A  
734 regression-based approach. Guilford publications; 2017.
- 735 55. Shrout PE, Bolger N. Mediation in experimental and nonexperimental studies: new  
736 procedures and recommendations. *Psychological methods*. 2002;7: 422.
- 737 56. Hayes AF, Scharkow M. The relative trustworthiness of inferential tests of the indirect  
738 effect in statistical mediation analysis: Does method really matter? *Psychological science*.  
739 2013;24: 1918–1927.
- 740 57. Cheung MWL. Comparison of methods for constructing confidence intervals of  
741 standardized indirect effects. *Behavior Research Methods*. 2009;41: 425–438.
- 742 58. IBM SPSS Statistics for Windows, Version 25.0. Armonk, NY: IBM Corp.; 2017.
- 743 59. Pastorino R, Villani L, Mariani M, Ricciardi W, Graffigna G, Boccia S. Impact of  
744 COVID-19 Pandemic on Flu and COVID-19 Vaccination Intentions among University  
745 Students. *Vaccines*. 2021;9: 70.
- 746 60. Baumeister RF, Leary MR. The need to belong: desire for interpersonal attachments as a  
747 fundamental human motivation. *Psychological bulletin*. 1995;117: 497.
- 748 61. Frew PM, Lutz CS. Interventions to increase pediatric vaccine uptake: An overview of  
749 recent findings. *Human vaccines & immunotherapeutics*. 2017;13: 2503–2511.
- 750 62. Glaeser E, Sunstein CR. Does more speech correct falsehoods? *The Journal of Legal  
751 Studies*. 2014;43: 65–93.
- 752 63. Betsch C, Böhm R, Korn L, Holtmann C. On the benefits of explaining herd immunity in  
753 vaccine advocacy. *Nature human behaviour*. 2017;1: 1–6.
- 754 64. Ibuka Y, Li M, Vietri J, Chapman GB, Galvani AP. Free-riding behavior in vaccination  
755 decisions: an experimental study. *PloS one*. 2014;9: e87164.
- 756 65. Mahase E. Covid-19: What do we know about “long covid”? *bmj*. 2020;370.
- 757 66. Cialdini RB. *Influence: Science and practice*. Pearson education Boston, MA; 2009.
- 758 67. Auslander BA, Meers JM, Short MB, Zimet GD, Rosenthal SL. A qualitative analysis of  
759 the vaccine intention–behaviour relationship: parents’ descriptions of their intentions,  
760 decision-making behaviour and planning processes towards HPV vaccination. *Psychology  
761 & Health*. 2019;34: 271–288. doi:10.1080/08870446.2018.1523408
- 762 68. daCosta DiBonaventura M, Chapman GB. Moderators of the intention–behavior  
763 relationship in influenza vaccinations: Intention stability and unforeseen barriers.  
764 *Psychology & Health*. 2005;20: 761–774. doi:10.1080/14768320500183368
- 765 69. Sheeran P. Intention—behavior relations: a conceptual and empirical review. *European  
766 review of social psychology*. 2002;12: 1–36.
- 767 70. Malik AA, McFadden SM, Elharake J, Omer SB. Determinants of COVID-19 vaccine  
768 acceptance in the US. *EClinicalMedicine*. 2020;26: 100495.  
769 doi:<https://doi.org/10.1016/j.eclinm.2020.100495>

## 771 **Supporting information**

772 **S1 Table. Mean, Standard Deviations (SD) and Correlations of all Variables.**

773

774

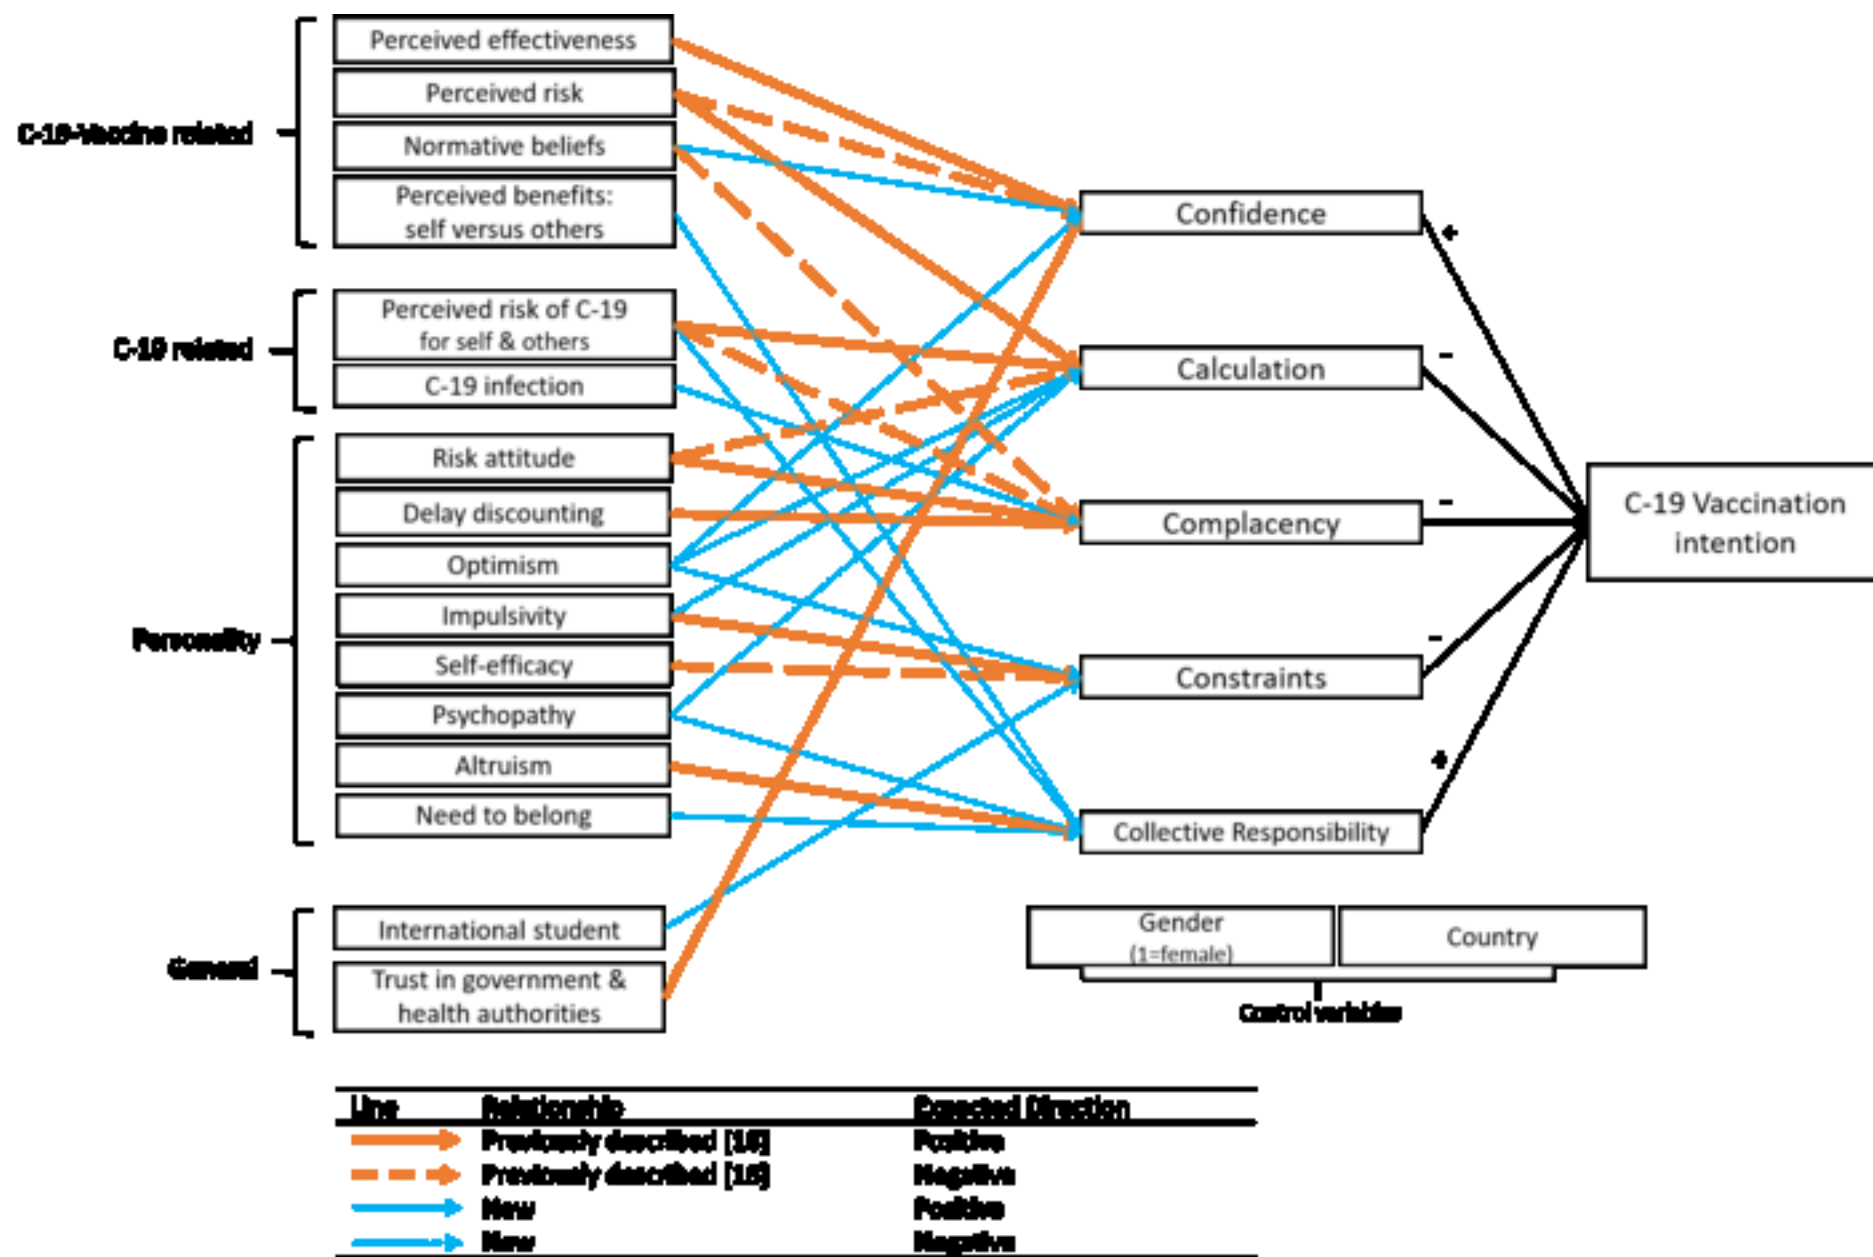

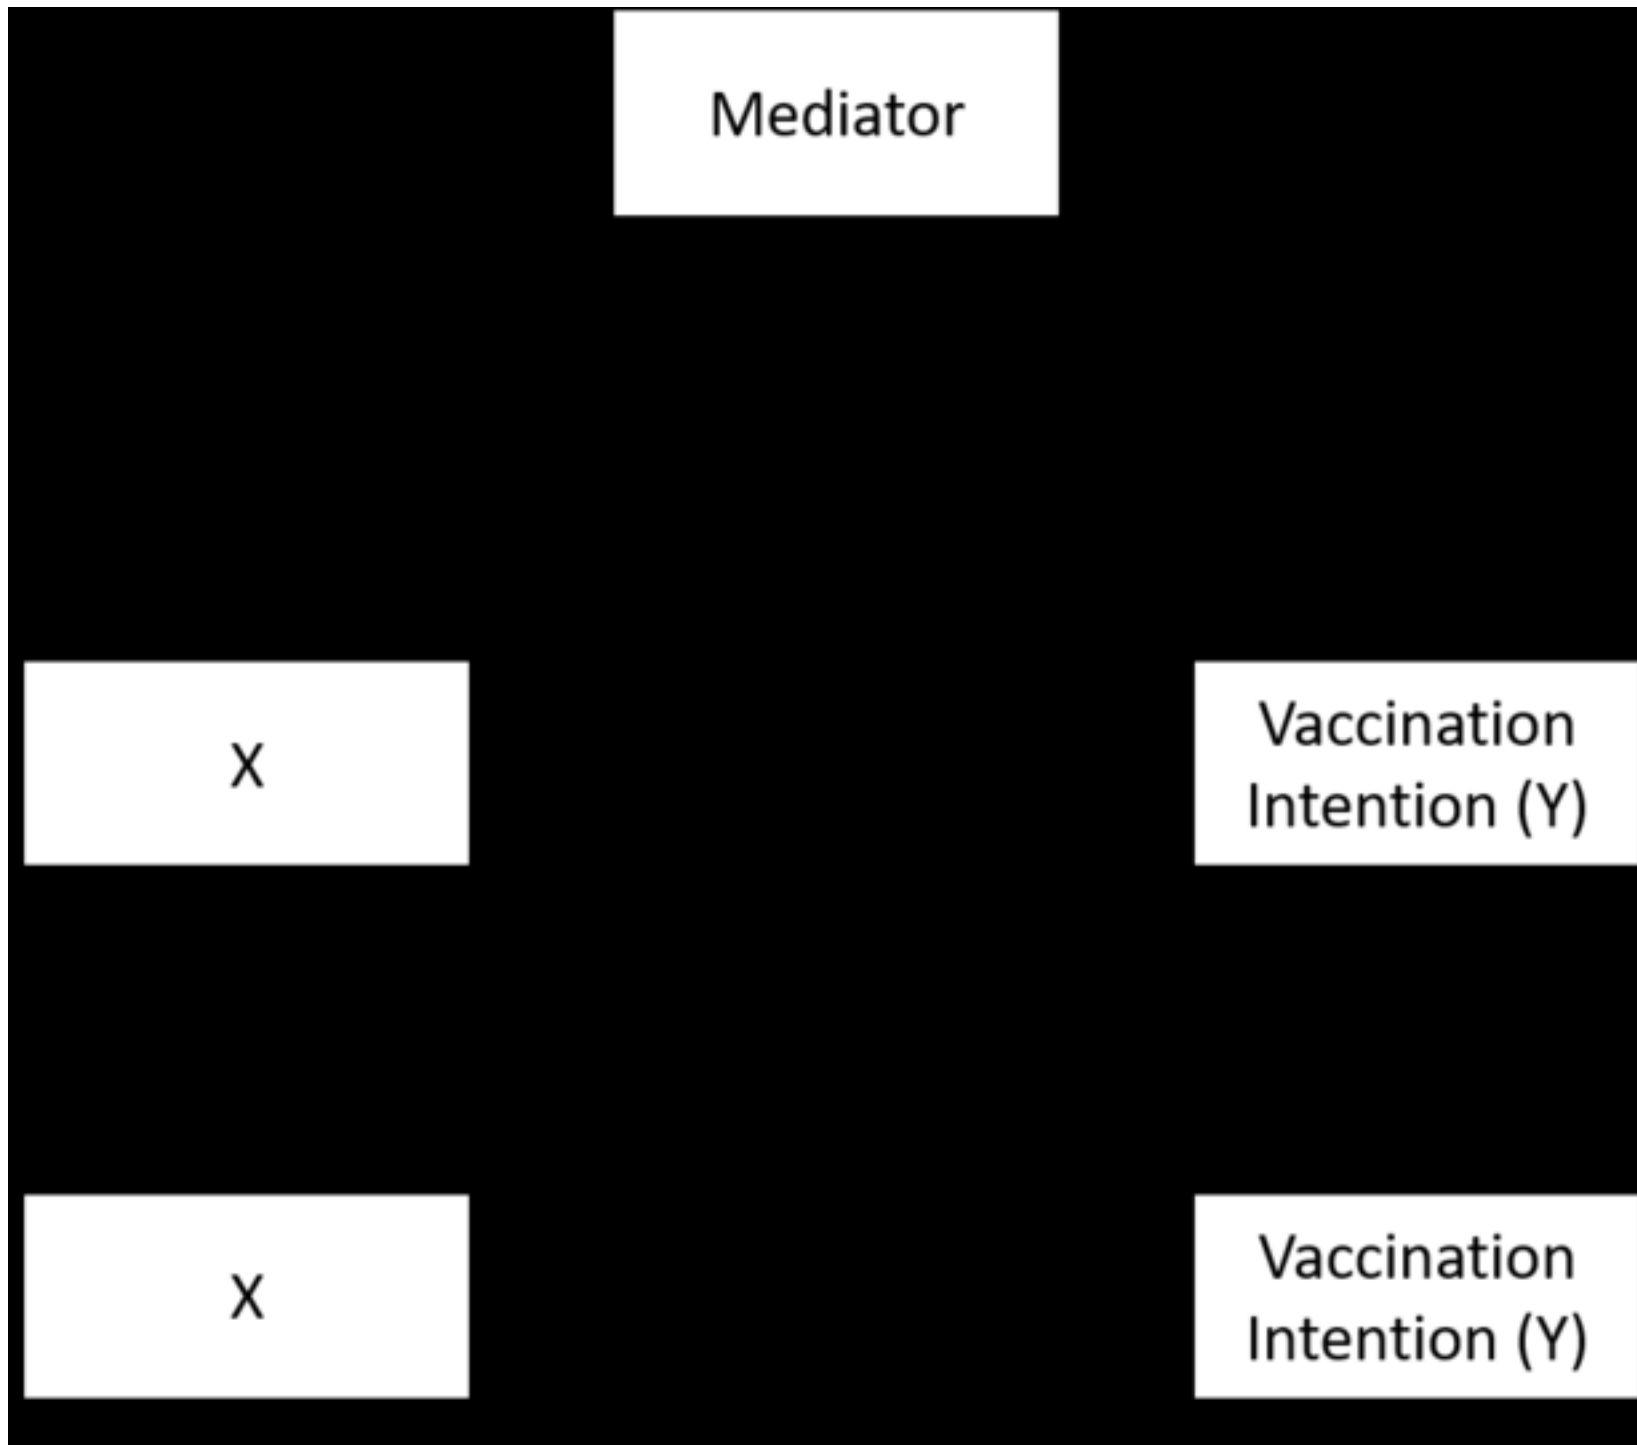

### Vaccination Intention (%) (N=1137)

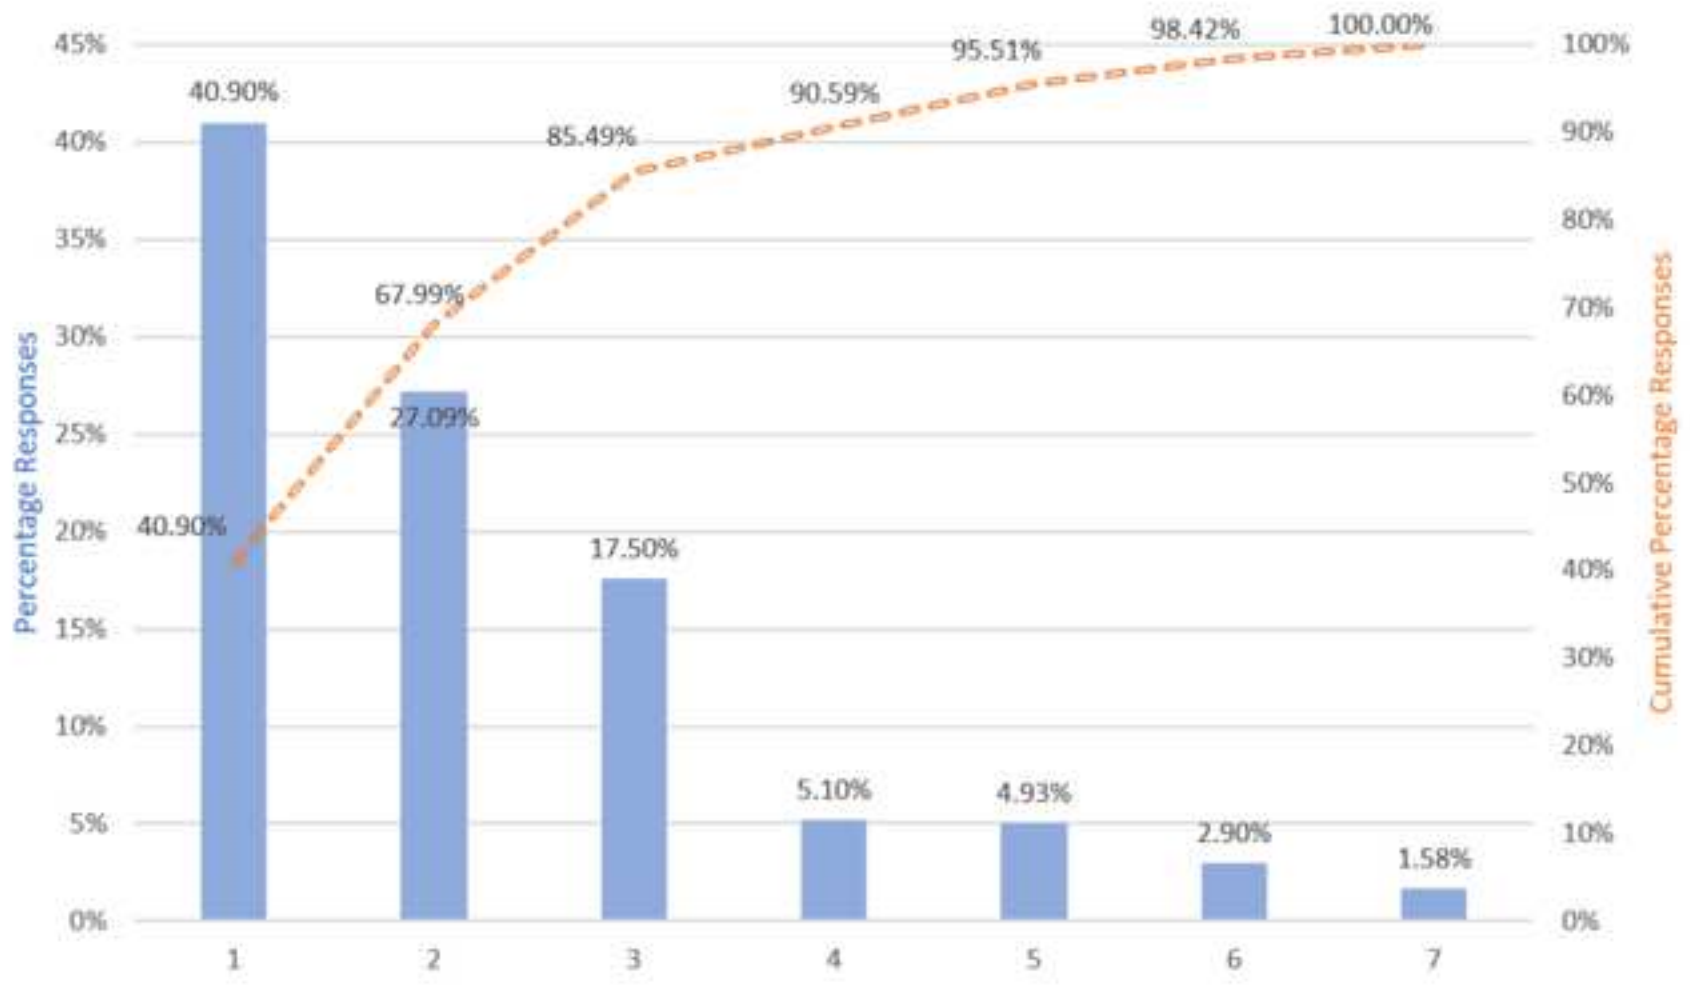

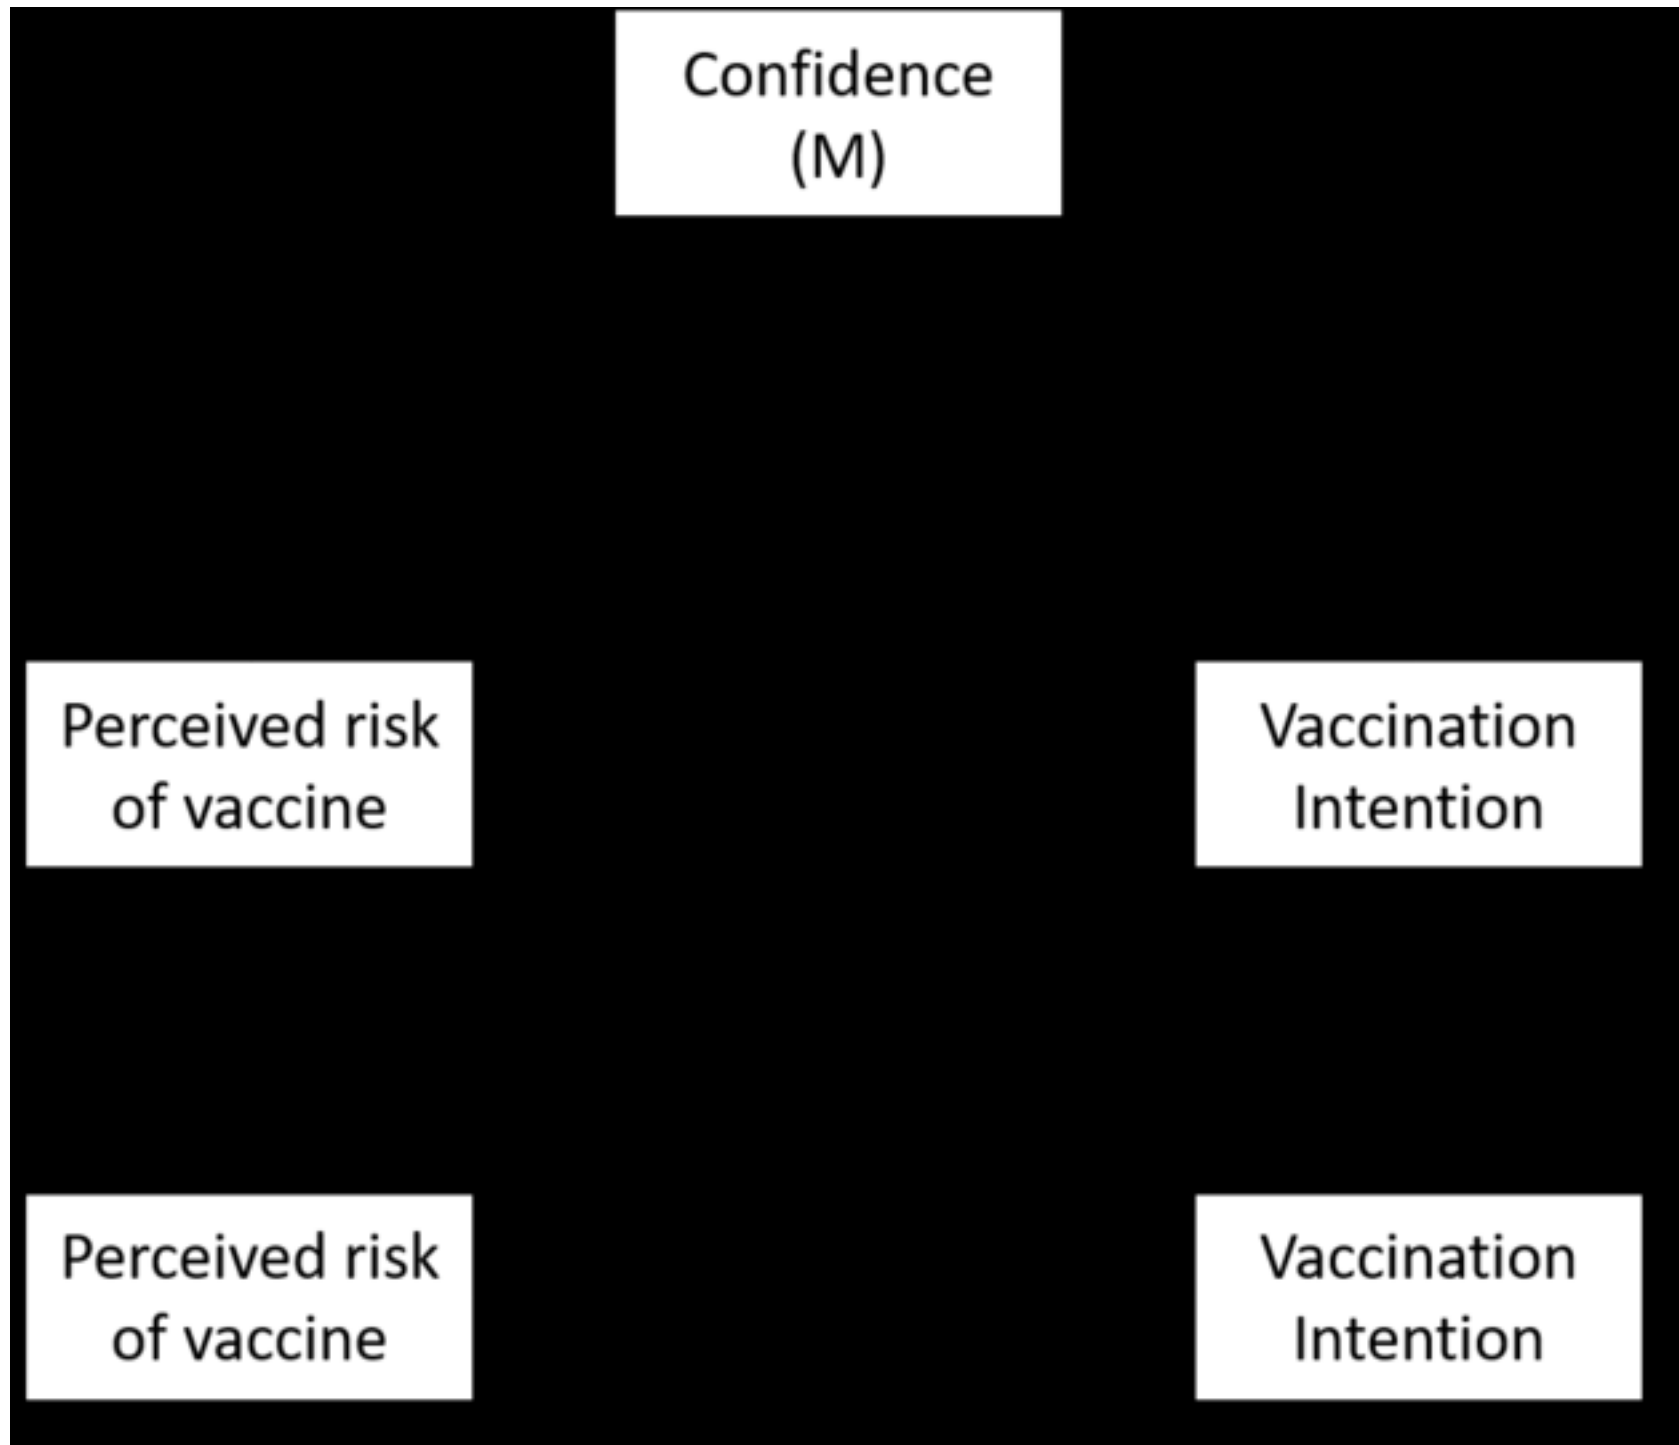





Click here to access/download  
**Supporting Information**  
S1\_file.docx



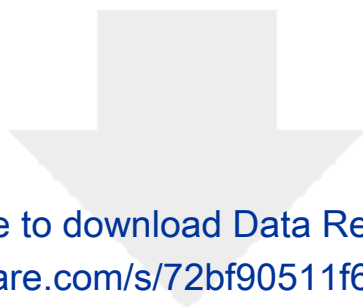

Click here to download Data Review URL  
<http://figshare.com/s/72bf90511f6a65519196>

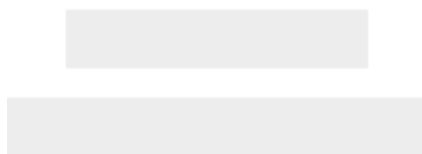

Supplement: pone.0255382.s002.pdf [file pone.0255382.s002.pdf]
